# Supplementary material for: Non-antimicrobial and Non-anticancer Properties of ZnO Nanoparticles Biosynthesized Using Different Plant Parts of Bixa orellana
Source: PubMed Central journal article supplement — ACS Omega. 2022 Jan 5;7(2):1914–33. doi: 10.1021/acsomega.1c05324 (PMC8771956; doi:10.1021/acsomega.1c05324), 2022-01-05
Supplement: ao1c05324_si_001.pdf [file ao1c05324_si_001.pdf]

## Supporting Information

Non-antimicrobial and non-anticancer properties of ZnO nanoparticles  
biosynthesized using different plant parts of *Bixa orellana*

Saeed Gharpure<sup>a,‡</sup>, Rachana Yadwade<sup>a,‡</sup> and Balaprasad Ankamwar<sup>a,\*</sup>

<sup>a</sup>Bio-Inspired Materials Research Laboratory, Department of Chemistry, Savitribai Phule Pune University (Formerly University of Pune), Ganeshkhind, Pune-411007, India

\*Corresponding Author

Balaprasad Ankamwar, [sb180305@gmail.com](mailto:sb180305@gmail.com)

‡Saeed Gharpure and Rachana Yadwade have equal contribution in this research.

(a)

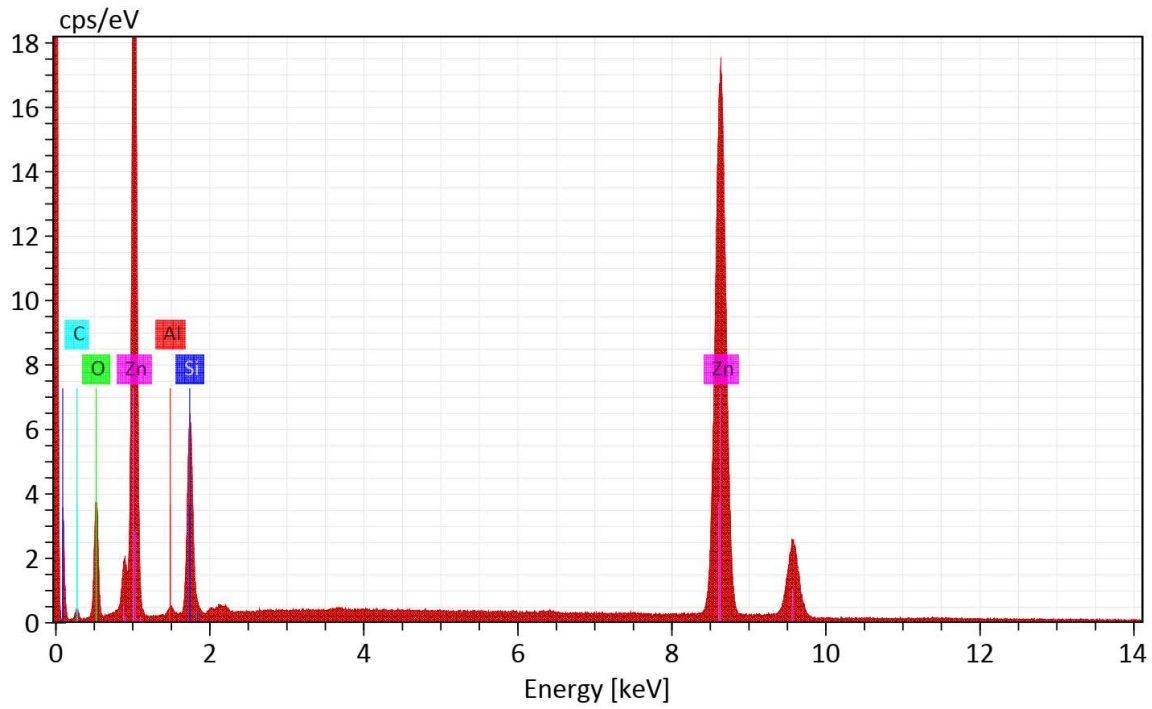

| Element   | At. No. | Netto      | Mass [%]     | Mass Norm. [%] | Atom [%]      | abs. error [%] (1 sigma) | rel. error [%] (1 sigma) |
|-----------|---------|------------|--------------|----------------|---------------|--------------------------|--------------------------|
| Oxygen    | 8       | 24020      | 16.41        | 17.22          | 36.12         | 2.09                     | 12.73                    |
| Zinc      | 30      | 336517     | 60.18        | 63.16          | 32.42         | 1.49                     | 2.48                     |
| Carbon    | 6       | 2281       | 4.75         | 4.99           | 13.94         | 0.90                     | 18.90                    |
| Aluminium | 13      | 1637       | 0.58         | 0.61           | 0.76          | 0.06                     | 10.49                    |
| Silicon   | 14      | 55810      | 13.36        | 14.02          | 16.76         | 0.62                     | 4.67                     |
|           |         | <b>Sum</b> | <b>95.28</b> | <b>100.00</b>  | <b>100.00</b> |                          |                          |

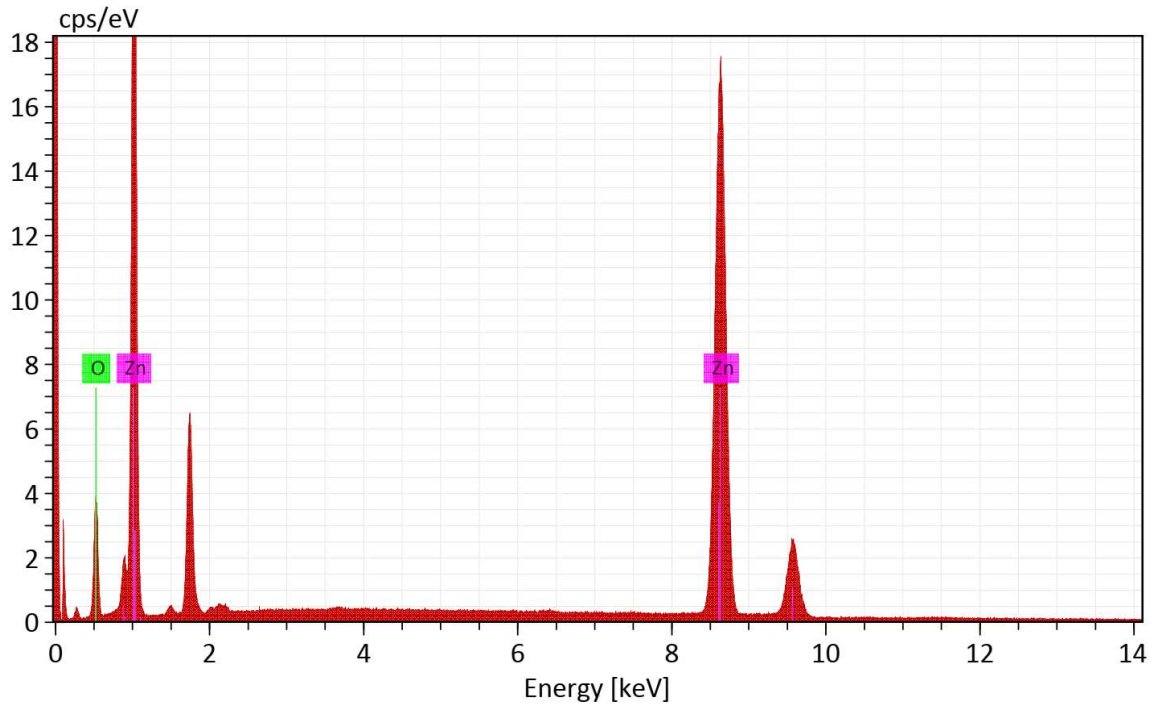

| Element | At. No. | Netto      | Mass [%]     | Mass Norm. [%] | Atom [%]      | abs. error [%]<br>(1 sigma) | rel. error [%]<br>(1 sigma) |
|---------|---------|------------|--------------|----------------|---------------|-----------------------------|-----------------------------|
| Oxygen  | 8       | 23908      | 15.26        | 18.52          | 48.16         | 1.95                        | 12.75                       |
| Zinc    | 30      | 336555     | 67.13        | 81.48          | 51.84         | 1.66                        | 2.48                        |
|         |         | <b>Sum</b> | <b>82.39</b> | <b>100.00</b>  | <b>100.00</b> |                             |                             |

(b)

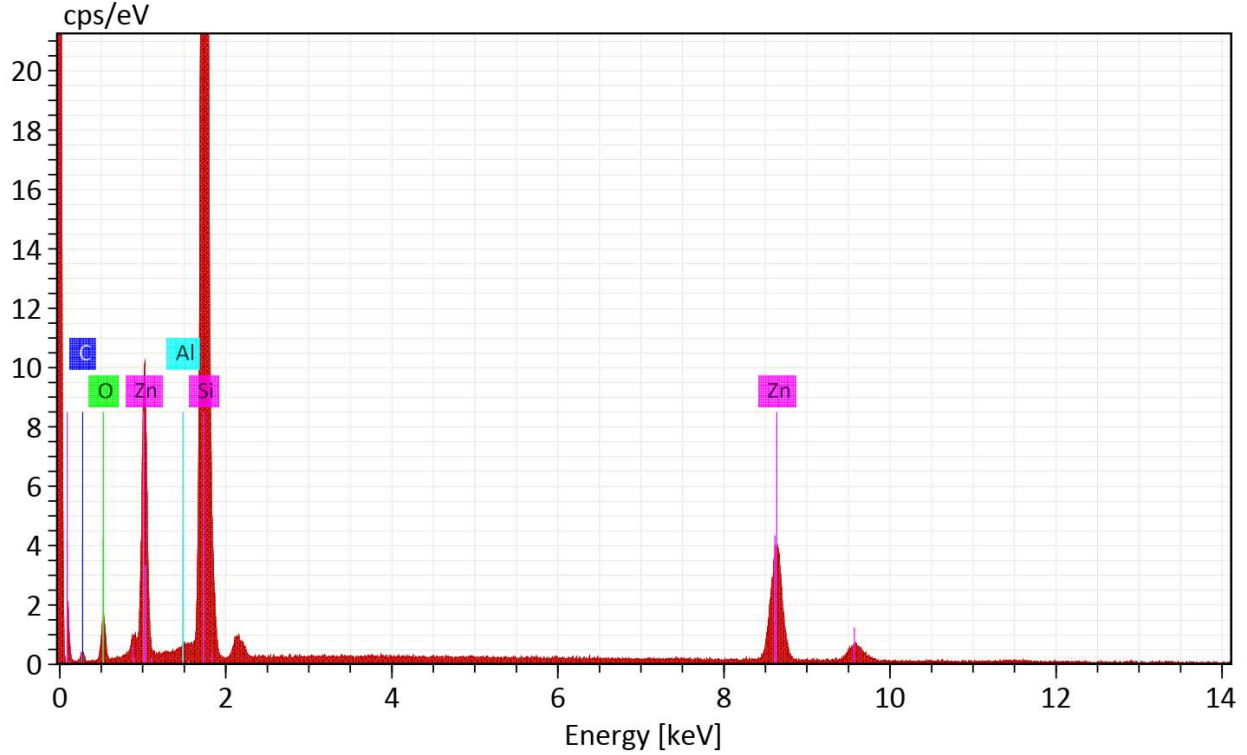

| Element | At. No. | Netto      | Mass [%]      | Mass Norm. [%] | Atom [%]      | abs. error [%] (1 sigma) | rel. error [%] (1 sigma) |
|---------|---------|------------|---------------|----------------|---------------|--------------------------|--------------------------|
| Oxygen  | 8       | 5926       | 12.12         | 11.30          | 17.75         | 1.87                     | 15.40                    |
| Zinc    | 30      | 44745      | 15.57         | 14.51          | 5.57          | 0.41                     | 2.65                     |
| Carbon  | 6       | 1468       | 9.24          | 8.62           | 18.02         | 1.91                     | 20.71                    |
| Silicon | 14      | 373601     | 70.35         | 65.57          | 58.66         | 3.15                     | 4.48                     |
|         |         | <b>Sum</b> | <b>107.28</b> | <b>100.00</b>  | <b>100.00</b> |                          |                          |



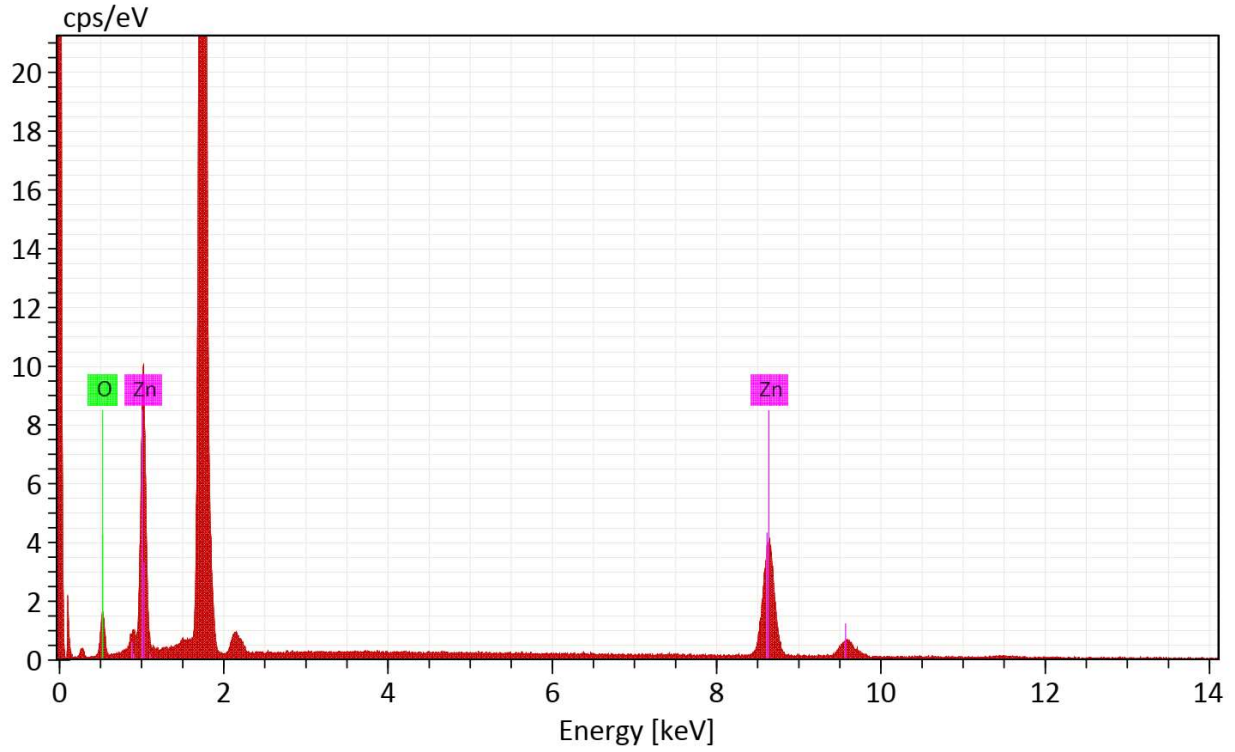

| Element    | At. No. | Netto | Mass [%]     | Mass Norm. [%] | Atom [%]      | abs. error [%]<br>(1 sigma) | rel. error [%]<br>(1 sigma) |
|------------|---------|-------|--------------|----------------|---------------|-----------------------------|-----------------------------|
| Oxygen     | 8       | 5817  | 8.51         | 27.69          | 61.01         | 1.32                        | 15.54                       |
| Zinc       | 30      | 44747 | 22.23        | 72.31          | 38.99         | 0.58                        | 2.60                        |
| <b>Sum</b> |         |       | <b>30.74</b> | <b>100.00</b>  | <b>100.00</b> |                             |                             |

(c)

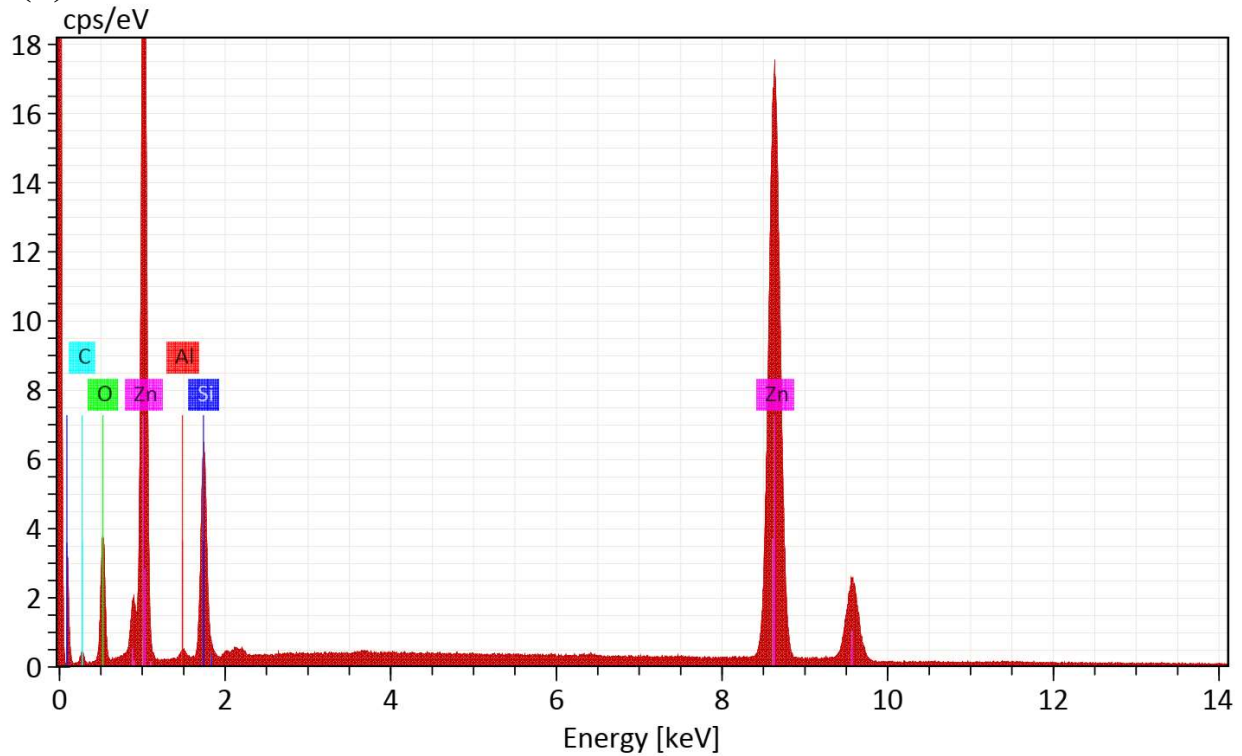

| Element   | At. No. | Netto      | Mass [%]     | Mass Norm. [%] | Atom [%]      | abs. error [%] (1 sigma) | rel. error [%] (1 sigma) |
|-----------|---------|------------|--------------|----------------|---------------|--------------------------|--------------------------|
| Oxygen    | 8       | 24020      | 16.41        | 17.22          | 36.12         | 2.09                     | 12.73                    |
| Zinc      | 30      | 336517     | 60.18        | 63.16          | 32.42         | 1.49                     | 2.48                     |
| Carbon    | 6       | 2281       | 4.75         | 4.99           | 13.94         | 0.90                     | 18.90                    |
| Aluminium | 13      | 1637       | 0.58         | 0.61           | 0.76          | 0.06                     | 10.49                    |
| Silicon   | 14      | 55810      | 13.36        | 14.02          | 16.76         | 0.62                     | 4.67                     |
|           |         | <b>Sum</b> | <b>95.28</b> | <b>100.00</b>  | <b>100.00</b> |                          |                          |

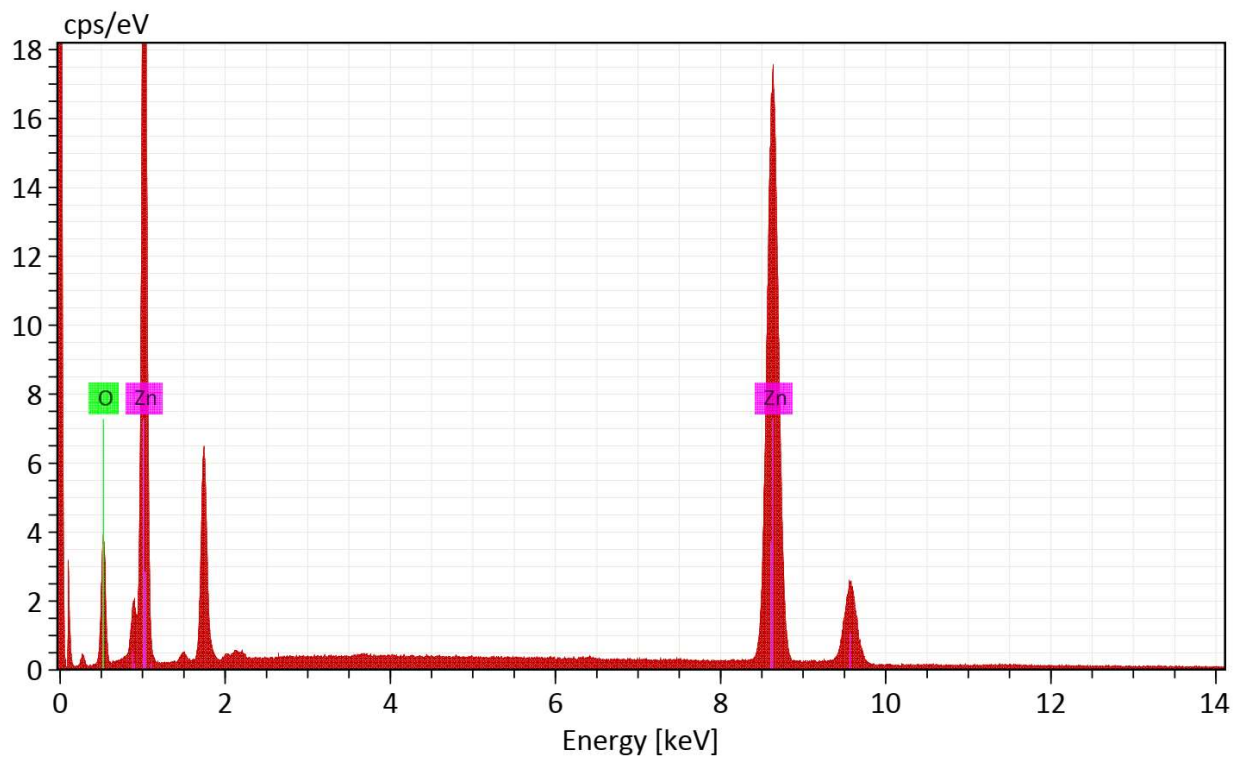

| Element    | At. No. | Netto  | Mass [%]     | Mass Norm. [%] | Atom [%]      | abs. error [%]<br>(1 sigma) | rel. error [%]<br>(1 sigma) |
|------------|---------|--------|--------------|----------------|---------------|-----------------------------|-----------------------------|
| Oxygen     | 8       | 23908  | 15.26        | 18.52          | 48.16         | 1.95                        | 12.75                       |
| Zinc       | 30      | 336555 | 67.13        | 81.48          | 51.84         | 1.66                        | 2.48                        |
| <b>Sum</b> |         |        | <b>82.39</b> | <b>100.00</b>  | <b>100.00</b> |                             |                             |

**Figure SI-1.** EDS spectra of L-ZnO (a), S-ZnO (b) and Sc-ZnO (c) in auto mode as well as only for zinc and oxygen

(a)

Library Search

<< Target >>

Line#1 R.Time:12.540(Scan#:2509) MassPeaks:117

RawMode:Single 12.540(2509) BasePeak:121.15(10000)

BG Mode:None Group 1 - Event 1 Scan

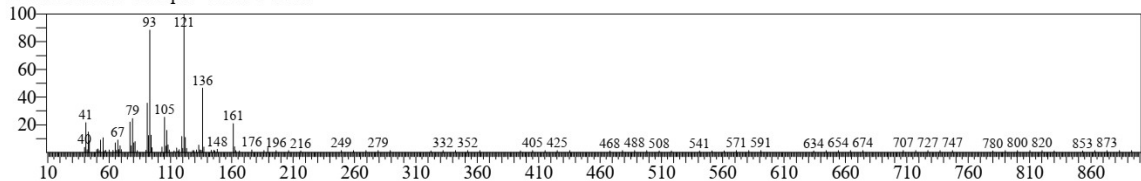

Hit#1 Entry:46695 Library:NIST11.lib

SI:92 Formula:C15H24 CAS:20307-84-0 MolWeight:204 RetIndex:1377

CompName:Cyclohexene, 4-ethenyl-4-methyl-3-(1-methylethenyl)-1-(1-methylethyl)-, (3R-trans)- \$\$ p-Menth-3-ene, 2-isopropenyl-1-vinyl-, (1S,2R)-(-)- \$\$

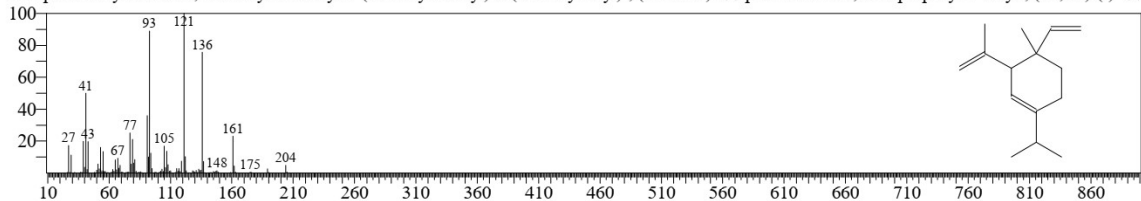

Hit#2 Entry:18110 Library:NIST11s.lib

SI:91 Formula:C15H24 CAS:20307-84-0 MolWeight:204 RetIndex:1377

CompName:Cyclohexene, 4-ethenyl-4-methyl-3-(1-methylethenyl)-1-(1-methylethyl)-, (3R-trans)- \$\$ p-Menth-3-ene, 2-isopropenyl-1-vinyl-, (1S,2R)-(-)- \$\$

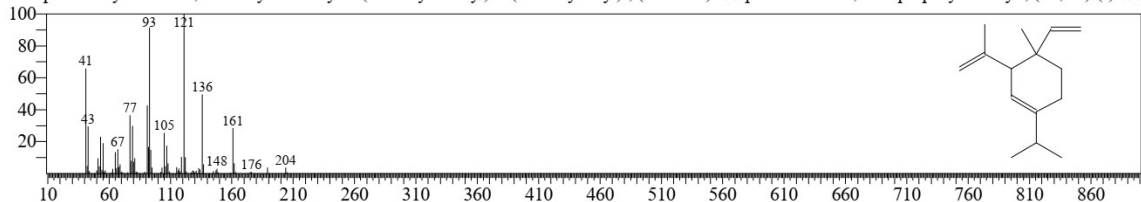

Hit#3 Entry:6679 Library:NIST11s.lib

SI:90 Formula:C10H16 CAS:99-86-5 MolWeight:136 RetIndex:998

CompName:1,3-Cyclohexadiene, 1-methyl-4-(1-methylethyl)- \$\$ .alpha.-Terpinene \$\$ .alpha.-Terpinene \$\$ p-Mentha-1,3-diene \$\$ Terpinene \$\$ 1-Isopropyl-

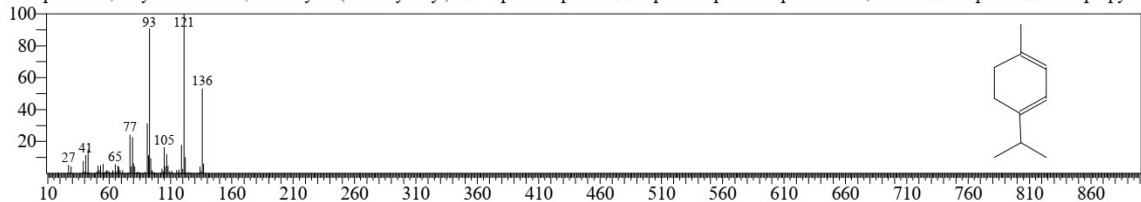

Hit#4 Entry:9826 Library:NIST11.lib

SI:90 Formula:C10H16 CAS:554-61-0 MolWeight:136 RetIndex:948

CompName:2-Carene \$\$ Bicyclo[4.1.0]hept-2-ene, 3,7,7-trimethyl- \$\$ .delta.-2-Carene \$\$ (+/-)-2-Carene \$\$ 3,7,7-Trimethylbicyclo[4.1.0]hept-2-ene \$\$

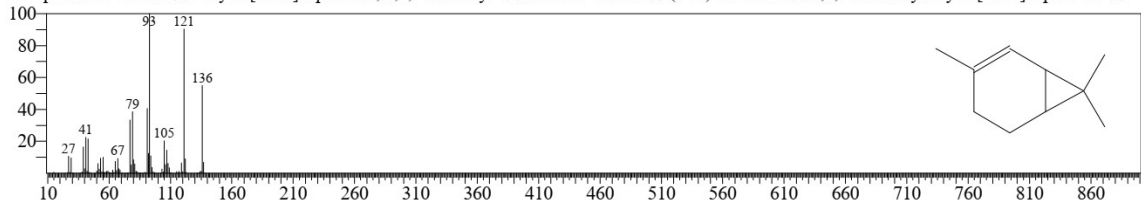

Hit#5 Entry:9827 Library:NIST11.lib

SI:89 Formula:C10H16 CAS:29050-33-7 MolWeight:136 RetIndex:919

CompName:(+)-4-Carene \$\$ 4,7,7-Trimethylbicyclo[4.1.0]hept-2-ene # \$\$

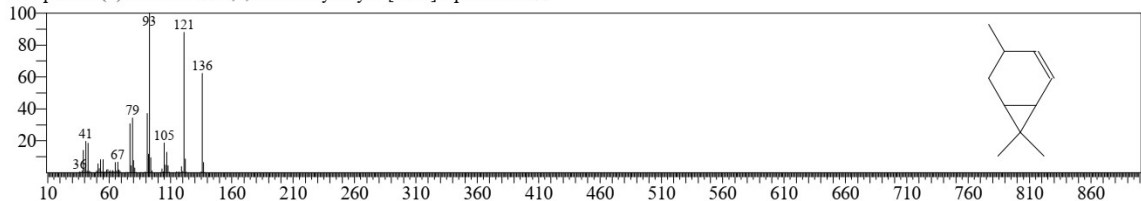

## Library Search

&lt;&lt; Target &gt;&gt;

Line#:1 R.Time:13.145(Scan#:2630) MassPeaks:80  
RawMode:Single 13.145(2630) BasePeak:105.10(10000)  
BG Mode:None Group 1 - Event 1 Scan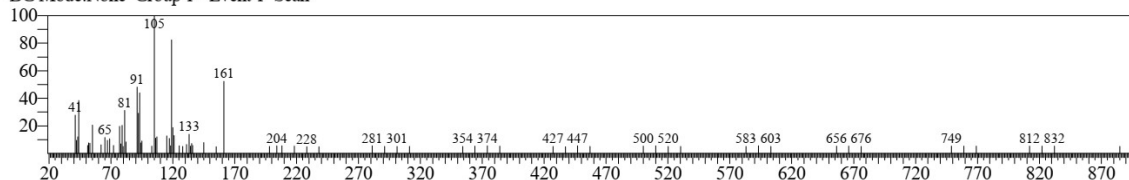

Hit#:1 Entry:18104 Library:NIST11s.lib

SI:83 Formula:C15H24 CAS:3856-25-5 MolWeight:204 RetIndex:1221

CompName:Copaene \$\$ Tricyclo[4.4.0.0.2,7]dec-3-ene, 1,3-dimethyl-8-(1-methylethyl)-, stereoisomer \$\$ Tricyclo[4.4.0.0.2,7]dec-3-ene, 8-isopropyl-1,3-din

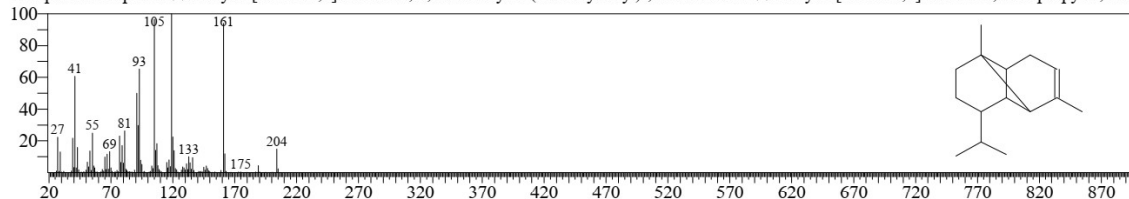

Hit#:2 Entry:18133 Library:NIST11s.lib

SI:83 Formula:C15H24 CAS:3856-25-5 MolWeight:204 RetIndex:1221

CompName:Copaene \$\$ Tricyclo[4.4.0.0.2,7]dec-3-ene, 1,3-dimethyl-8-(1-methylethyl)-, stereoisomer \$\$ Tricyclo[4.4.0.0.2,7]dec-3-ene, 8-isopropyl-1,3-din

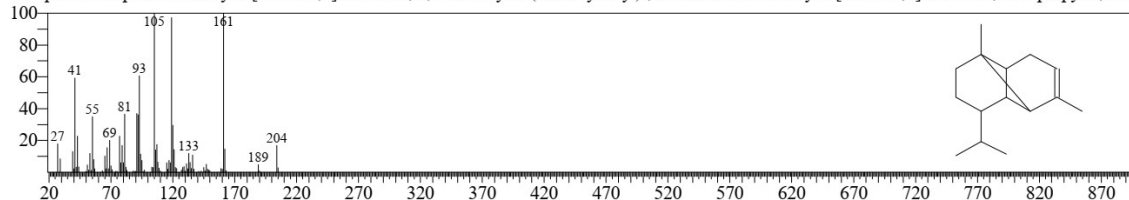

Hit#:3 Entry:18090 Library:NIST11s.lib

SI:82 Formula:C15H24 CAS:17699-14-8 MolWeight:204 RetIndex:1344

CompName:alpha.-Cubebene \$\$ 1H-Cyclopenta[1,3]cyclopropa[1,2]benzene, 3a,3b,4,5,6,7-hexahydro-3,7-dimethyl-4-(1-methylethyl)-, [3aS-(3a.alpha.,3b.

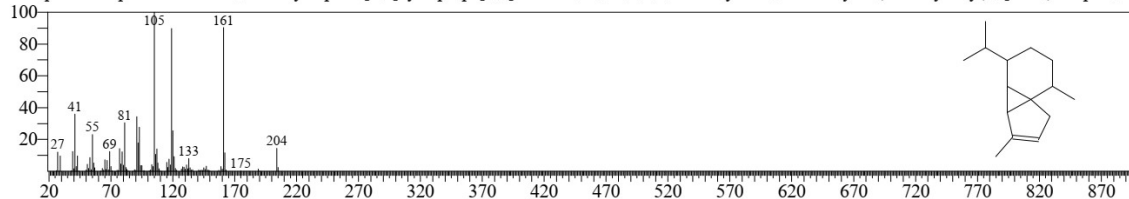

Hit#:4 Entry:46736 Library:NIST11.lib

SI:81 Formula:C15H24 CAS:3856-25-5 MolWeight:204 RetIndex:1221

CompName:Copaene \$\$ Tricyclo[4.4.0.0.2,7]dec-3-ene, 1,3-dimethyl-8-(1-methylethyl)-, stereoisomer \$\$ Tricyclo[4.4.0.0.2,7]dec-3-ene, 8-isopropyl-1,3-din

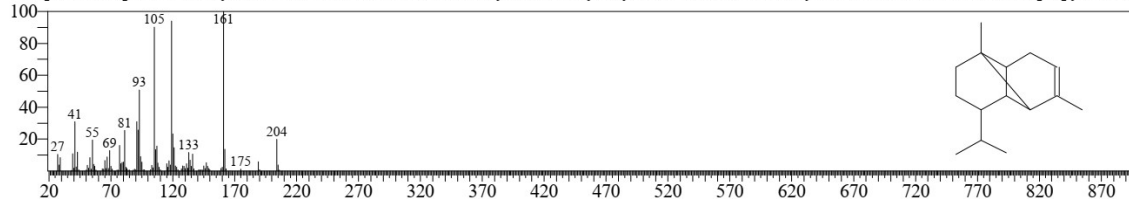

Hit#:5 Entry:46726 Library:NIST11.lib

SI:81 Formula:C15H24 CAS:17699-14-8 MolWeight:204 RetIndex:1344

CompName:alpha.-Cubebene \$\$ 1H-Cyclopenta[1,3]cyclopropa[1,2]benzene, 3a,3b,4,5,6,7-hexahydro-3,7-dimethyl-4-(1-methylethyl)-, [3aS-(3a.alpha.,3b.

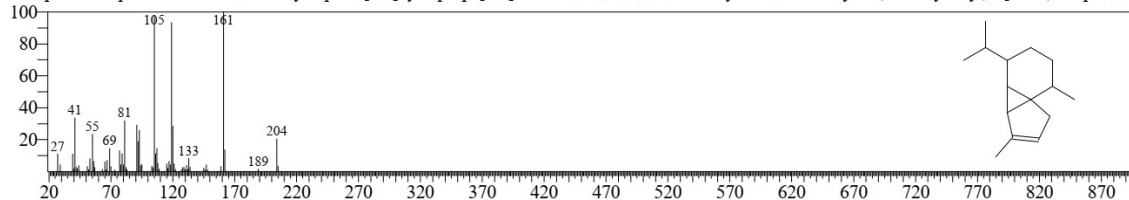

Library Search

<< Target >>

Line#:1 R.Time:13.785(Scan#:2758) MassPeaks:55

RawMode:Single 13.785(2758) BasePeak:91.10(10000)

BG Mode:None Group 1 - Event 1 Scan

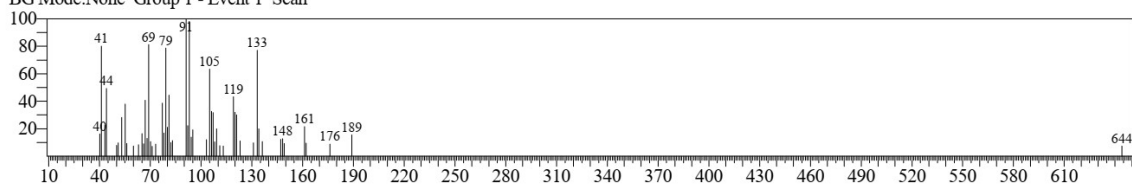

Hit#:1 Entry:46636 Library:NIST11s.lib

SI:90 Formula:C15H24 CAS:87-44-5 MolWeight:204 RetIndex:1494

CompName:Caryophyllene \$\$ Bicyclo[7.2.0]undec-4-ene, 4,11,11-trimethyl-8-methylene-, [1R-(1R\*,4E,9S\*)]- \$\$ Bicyclo[7.2.0]undec-4-ene, 4,11,11-trimethyl-

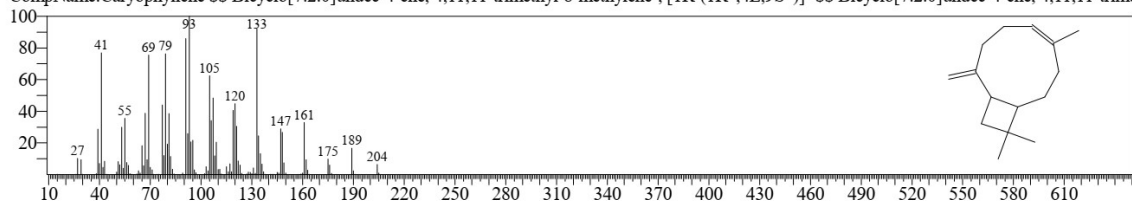

Hit#:2 Entry:18069 Library:NIST11s.lib

SI:87 Formula:C15H24 CAS:87-44-5 MolWeight:204 RetIndex:1494

CompName:Caryophyllene \$\$ Bicyclo[7.2.0]undec-4-ene, 4,11,11-trimethyl-8-methylene-, [1R-(1R\*,4E,9S\*)]- \$\$ Bicyclo[7.2.0]undec-4-ene, 4,11,11-trimethyl-

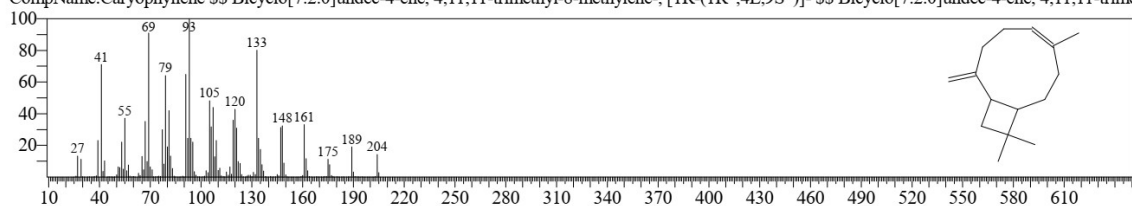

Hit#:3 Entry:18068 Library:NIST11s.lib

SI:87 Formula:C15H24 CAS:13877-93-5 MolWeight:204 RetIndex:1494

CompName:Bicyclo[7.2.0]undec-4-ene, 4,11,11-trimethyl-8-methylene-, (Z)- \$\$ cis-4,11,11-

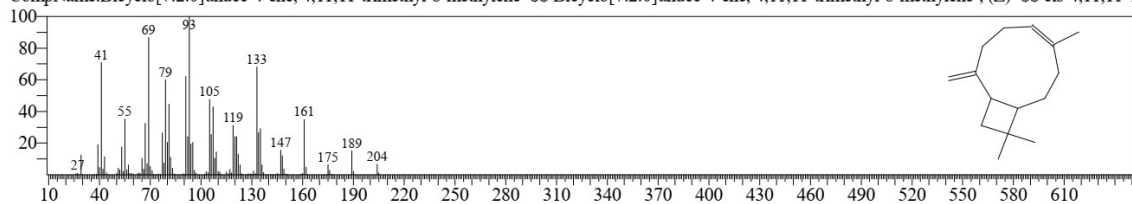

Hit#:4 Entry:18035 Library:NIST11s.lib

SI:87 Formula:C15H24 CAS:118-65-0 MolWeight:204 RetIndex:1494

CompName:Bicyclo[7.2.0]undec-4-ene, 4,11,11-trimethyl-8-methylene-, [1R-(1R\*,4Z,9S\*)]- \$\$ Isocaryophyllene \$\$ 4,11,11-Trimethyl-8-methylenebicyclo[7.2.0]undec-4-ene, 4,11,11-trimethyl-

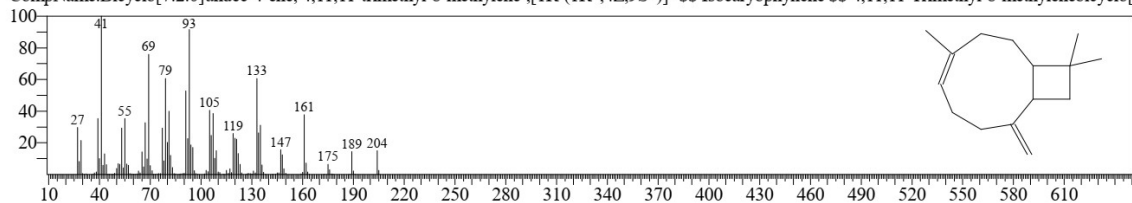

Hit#:5 Entry:46618 Library:NIST11s.lib

SI:87 Formula:C15H24 CAS:13877-93-5 MolWeight:204 RetIndex:1494

CompName:Bicyclo[7.2.0]undec-4-ene, 4,11,11-trimethyl-8-methylene-, (Z)- \$\$ cis-4,11,11-

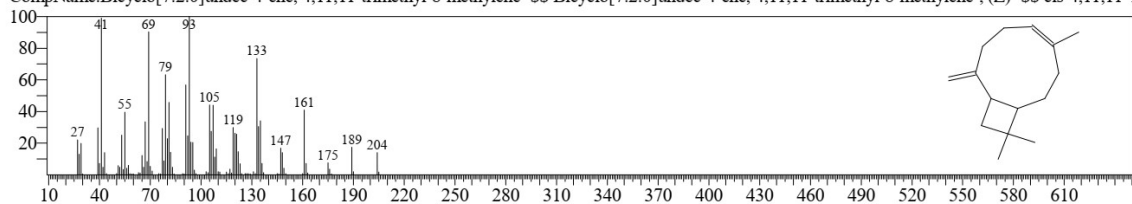

Library Search

<< Target >>

Line#:1 R.Time:13.895(Scan#:2780) MassPeaks:91  
 RawMode:Single 13.895(2780) BasePeak:121.15(10000)  
 BG Mode:None Group 1 - Event 1 Scan

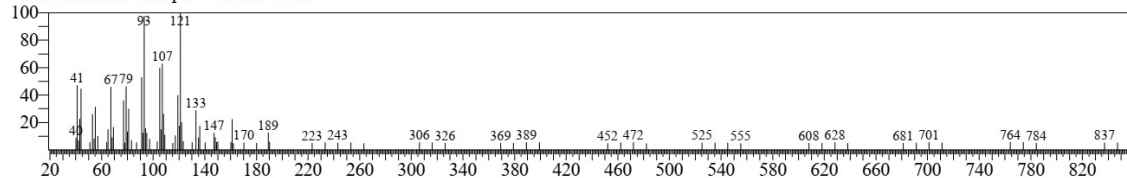

Hit#:1 Entry:18041 Library:NIST11s.lib  
 SI:89 Formula:C15H24 CAS:29873-99-2 MolWeight:204 RetIndex:1431  
 CompName: gamma-Elemene SS 1-Methyl-2-(1-methylethenyl)-4-(1-methylethylidene)-1-vinylcyclohexane, (1R-trans)- SS (-)- gamma-Elemene SS o-Mer

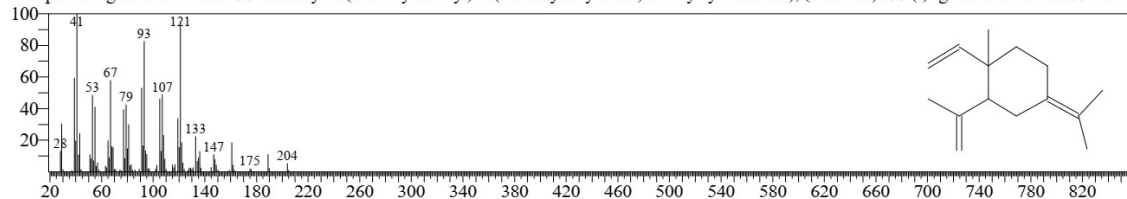

Hit#:2 Entry:46692 Library:NIST11.lib  
 SI:87 Formula:C15H24 CAS:29873-99-2 MolWeight:204 RetIndex:1431  
 CompName: gamma-Elemene SS 1-Methyl-2-(1-methylethenyl)-4-(1-methylethylidene)-1-vinylcyclohexane, (1R-trans)- SS (-)- gamma-Elemene SS o-Mer

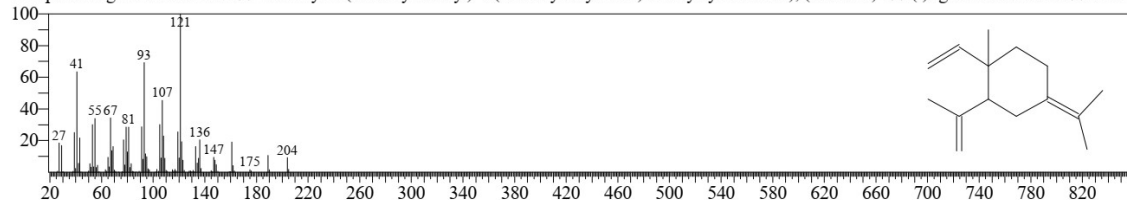

Hit#:3 Entry:18109 Library:NIST11s.lib  
 SI:86 Formula:C15H24 CAS:29873-99-2 MolWeight:204 RetIndex:1431  
 CompName: gamma-Elemene SS 1-Methyl-2-(1-methylethenyl)-4-(1-methylethylidene)-1-vinylcyclohexane, (1R-trans)- SS (-)- gamma-Elemene SS o-Mer

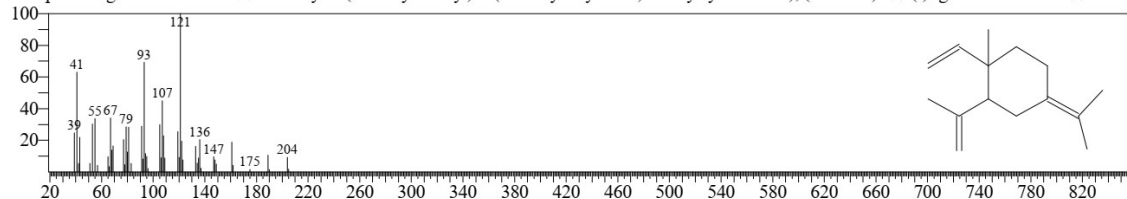

Hit#:4 Entry:46693 Library:NIST11.lib  
 SI:86 Formula:C15H24 CAS:15423-57-1 MolWeight:204 RetIndex:1603  
 CompName: 1,5-Cyclodecadiene, 1,5-dimethyl-8-(1-methylethylidene)-, (E,E)- SS Germacrene B SS Germacra-1(10),4,7(11)-triene SS Germacra-1(10),4,7(11)-triene

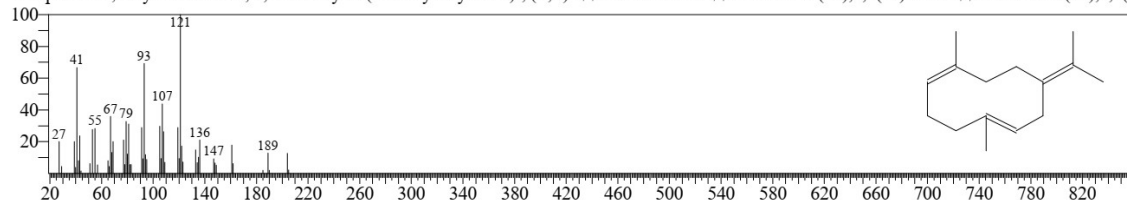

Hit#:5 Entry:18111 Library:NIST11s.lib  
 SI:84 Formula:C15H24 CAS:3242-08-8 MolWeight:204 RetIndex:1431  
 CompName: Cyclohexane, 1-ethenyl-1-methyl-2-(1-methylethenyl)-4-(1-methylethylidene)- SS o-Menth-8-ene, 4-isopropylidene-1-vinyl- SS Elixene SS 2-Isopropylidene-1-vinylcyclohexane

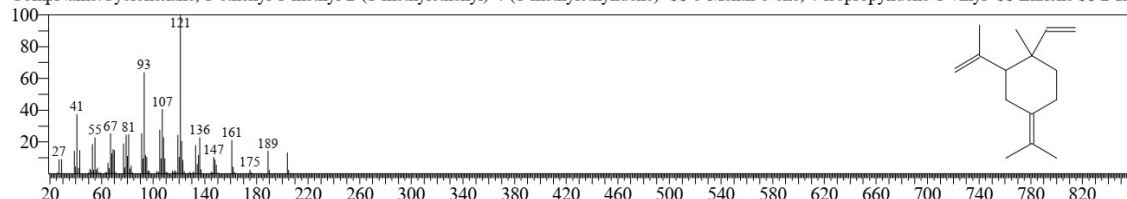

Library Search

<< Target >>

Line#:1 R.Time:14.610(Scan#:2923) MassPeaks:104  
 RawMode:Single 14.610(2923) BasePeak:105.10(10000)  
 BG Mode:None Group 1 - Event 1 Scan

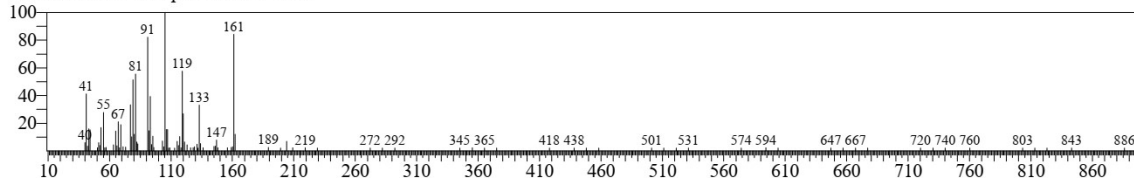

Hit#:1 Entry:46722 Library:NIST11.lib  
 SI:92 Formula:C15H24 CAS:23986-74-5 MolWeight:204 RetIndex:1515  
 CompName:1,6-Cyclodecadiene, 1-methyl-5-methylene-8-(1-methylethyl)-, [S-(E,E)]- \$\$ Germacrene D \$\$ 8-Isopropyl-1-methyl-5-methylene-1,6-cyclodec

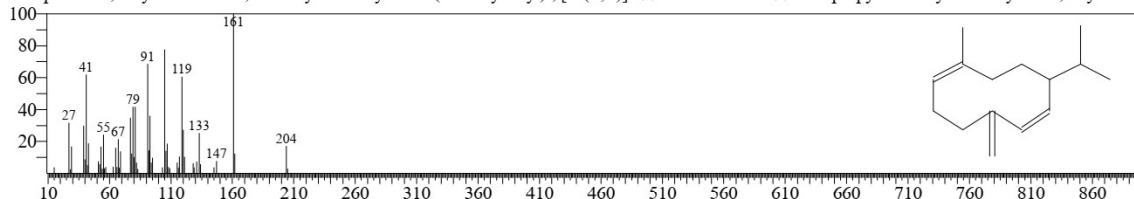

Hit#:2 Entry:46720 Library:NIST11.lib  
 SI:89 Formula:C15H24 CAS:0-00-0 MolWeight:204 RetIndex:1216  
 CompName:beta.-copaene

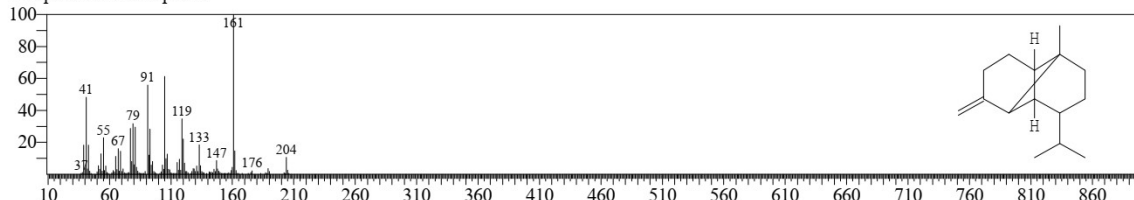

Hit#:3 Entry:18130 Library:NIST11s.lib  
 SI:88 Formula:C15H24 CAS:483-75-0 MolWeight:204 RetIndex:1440  
 CompName:Naphthalene, 1,2,4a,5,6,8a-hexahydro-4,7-dimethyl-1-(1-methylethyl)- \$\$ 1-Isopropyl-4,7-dimethyl-1,2,4a,5,6,8a-hexahydronaphthalene # \$\$ 1

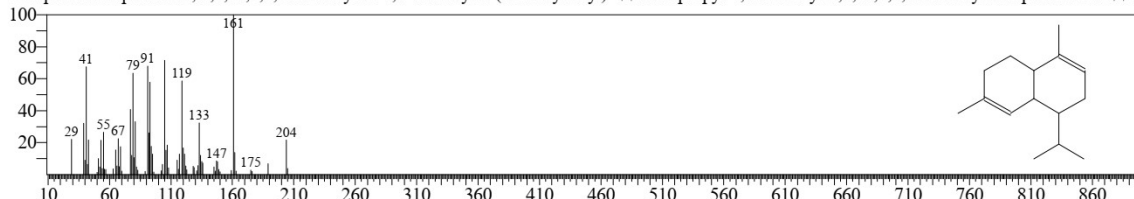

Hit#:4 Entry:46691 Library:NIST11.lib  
 SI:88 Formula:C15H24 CAS:0-00-0 MolWeight:204 RetIndex:1216  
 CompName:beta.-ylangene

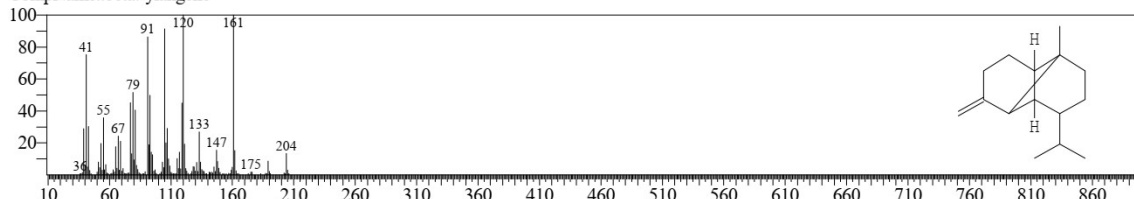

Hit#:5 Entry:18123 Library:NIST11s.lib  
 SI:88 Formula:C15H24 CAS:13744-15-5 MolWeight:204 RetIndex:1339  
 CompName:1H-Cyclopenta[1,3]cyclopropa[1,2]benzene, octahydro-7-methyl-3-methylene-4-(1-methylethyl)-, [3aS-(3a.alpha.,3b.beta.,4.beta.,7.alpha.,7aS\*

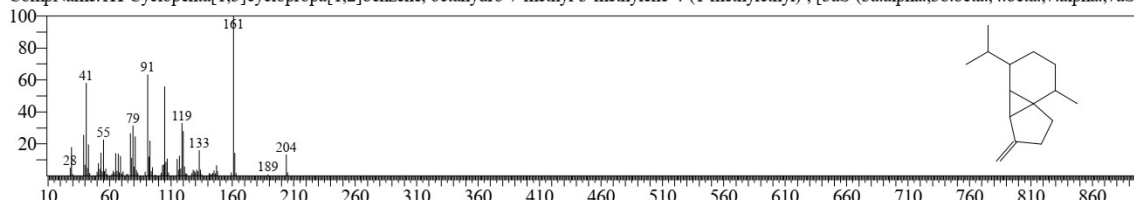



Library Search

<< Target >>

Line#: 1 R.Time:14.800(Scan#:2961) MassPeaks:115

RawMode:Single 14.800(2961) BasePeak:121.15(10000)

BG Mode:None Group 1 - Event 1 Scan

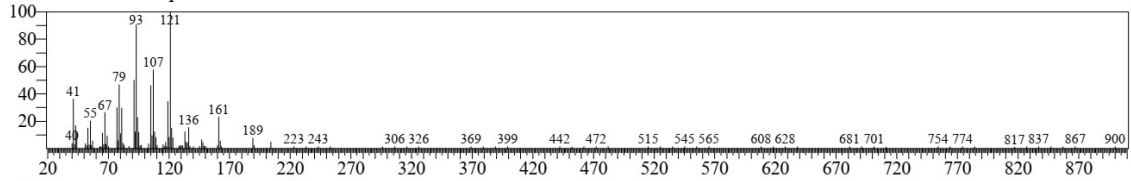

Hit#:1 Entry:46693 Library:NIST11.lib

SI:90 Formula:C15H24 CAS:15423-57-1 MolWeight:204 RetIndex:1603

CompName:1,5-Cyclodecadiene, 1,5-dimethyl-8-(1-methylethylidene)-, (E,E)- SS Germacrene B SS Germacra-1(10),4,7(11)-triene SS Germacra-1(10),4,7(11)-triene

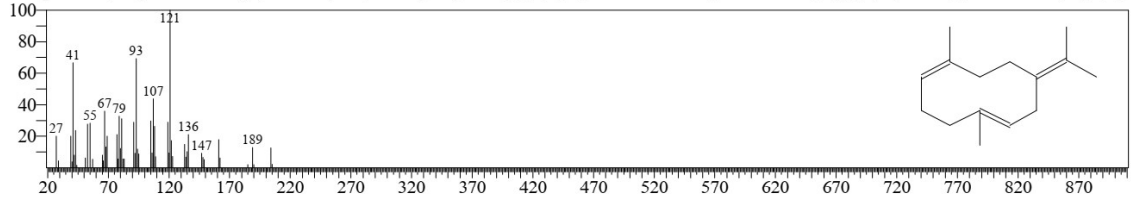

Hit#:2 Entry:46692 Library:NIST11.lib

SI:90 Formula:C15H24 CAS:29873-99-2 MolWeight:204 RetIndex:1431

CompName:gamma-Elemene SS 1-Methyl-2-(1-methylethenyl)-4-(1-methylethylidene)-1-vinylcyclohexane, (1R-trans)- SS (-)-gamma-Elemene SS o-Mer

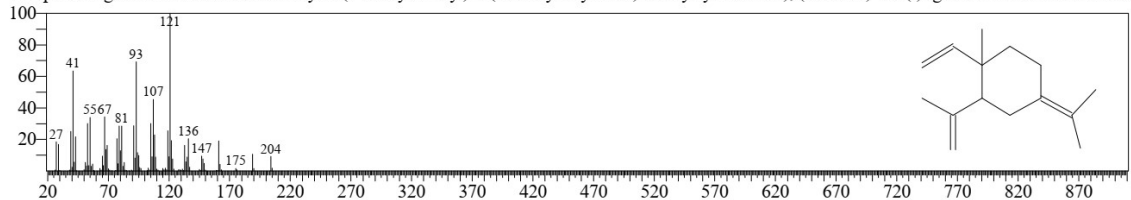

Hit#:3 Entry:18111 Library:NIST11s.lib

SI:90 Formula:C15H24 CAS:3242-08-8 MolWeight:204 RetIndex:1431

CompName:Cyclohexane, 1-ethenyl-1-methyl-2-(1-methylethenyl)-4-(1-methylethylidene)- SS o-Menth-8-ene, 4-isopropylidene-1-vinyl- SS Elixene SS 2-Is

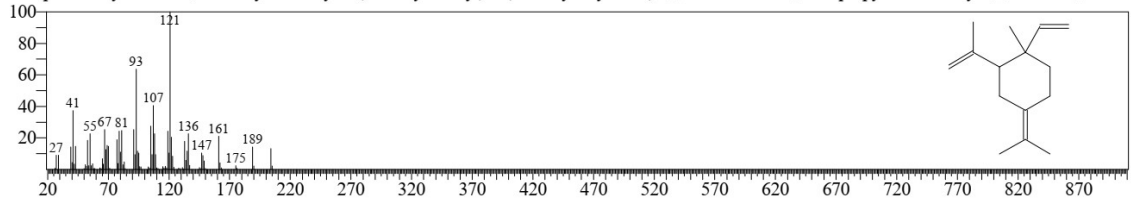

Hit#:4 Entry:18041 Library:NIST11s.lib

SI:90 Formula:C15H24 CAS:29873-99-2 MolWeight:204 RetIndex:1431

CompName:gamma-Elemene SS 1-Methyl-2-(1-methylethenyl)-4-(1-methylethylidene)-1-vinylcyclohexane, (1R-trans)- SS (-)-gamma-Elemene SS o-Mer

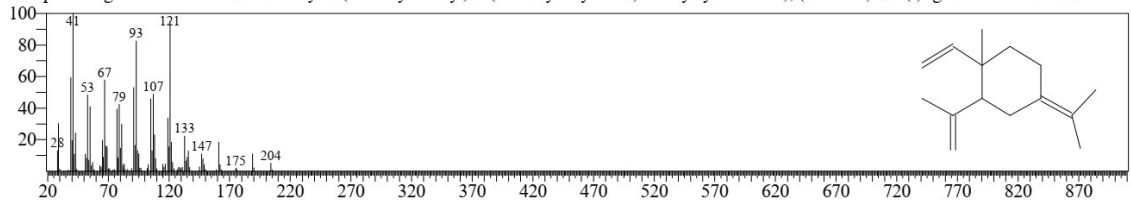

Hit#:5 Entry:18109 Library:NIST11s.lib

SI:89 Formula:C15H24 CAS:29873-99-2 MolWeight:204 RetIndex:1431

CompName:gamma-Elemene SS 1-Methyl-2-(1-methylethenyl)-4-(1-methylethylidene)-1-vinylcyclohexane, (1R-trans)- SS (-)-gamma-Elemene SS o-Mer

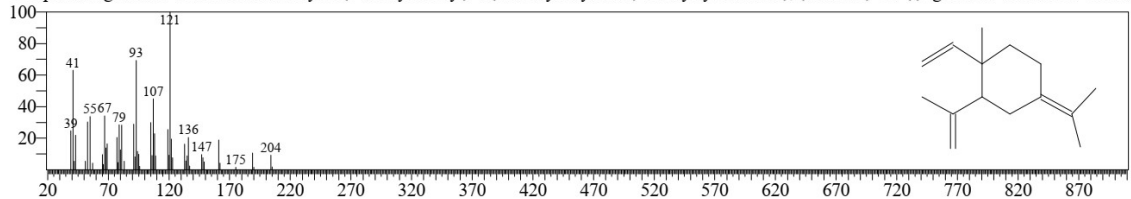

Library Search

<< Target >>

Line#:1 R.Time:15.605(Scan#:3122) MassPeaks:104  
 RawMode:Single 15.605(3122) BasePeak:93.10(10000)  
 BG Mode:None Group 1 - Event 1 Scan

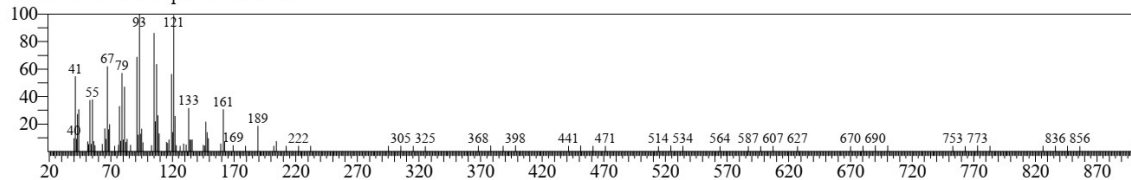

Hit#:1 Entry:18041 Library:NIST11s.lib  
 SI:89 Formula:C15H24 CAS:29873-99-2 MolWeight:204 RetIndex:1431  
 CompName:..gamma.-Elemene SS 1-Methyl-2-(1-methylethenyl)-4-(1-methylethylidene)-1-vinylcyclohexane, (1R-trans)- SS (-)-gamma.-Elemene SS o-Mer

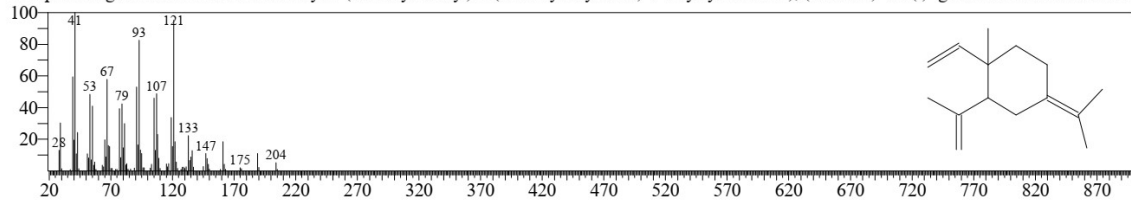

Hit#:2 Entry:46631 Library:NIST11.lib  
 SI:88 Formula:C15H24 CAS:0-00-0 MolWeight:204 RetIndex:1490  
 CompName:Guaia-1(10),11-diene

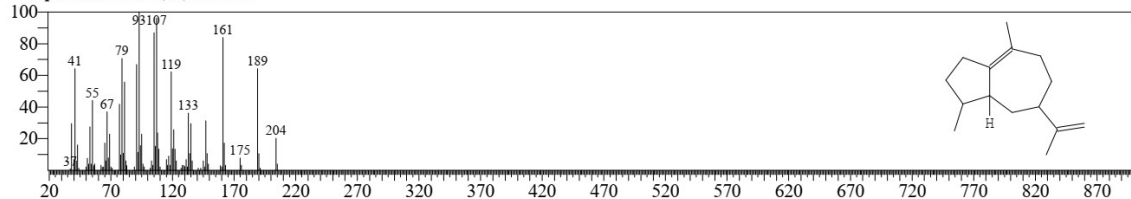

Hit#:3 Entry:46583 Library:NIST11.lib  
 SI:88 Formula:C15H24 CAS:0-00-0 MolWeight:204 RetIndex:1494  
 CompName:1R,3Z,9s-4,11,11-Trimethyl-8-methylenebicyclo[7.2.0]undec-3-ene SS 4,11,11-Trimethyl-8-methylenebicyclo[7.2.0]undec-3-ene # SS

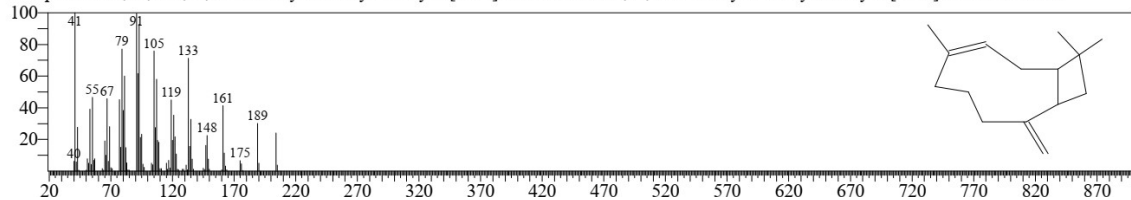

Hit#:4 Entry:18058 Library:NIST11s.lib  
 SI:87 Formula:C15H24 CAS:515-13-9 MolWeight:204 RetIndex:1398  
 CompName:Cyclohexane, 1-ethenyl-1-methyl-2,4-bis(1-methylethenyl)-, [1S-(1.alpha.,2.beta.,4.beta.)]- SS Cyclohexane, 2,4-diisopropenyl-1-methyl-1-vinyl

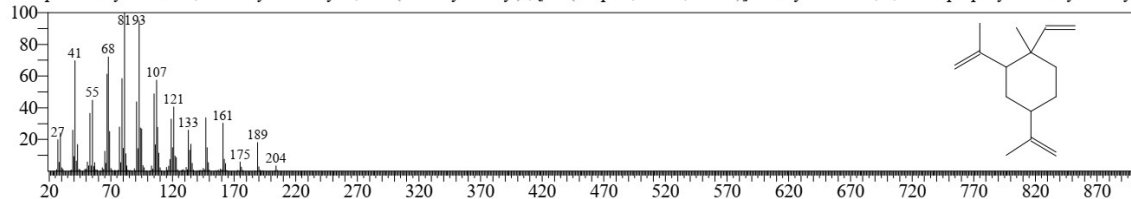

Hit#:5 Entry:18061 Library:NIST11s.lib  
 SI:87 Formula:C15H24 CAS:25246-27-9 MolWeight:204 RetIndex:1386  
 CompName:Alloaromadendrene SS 1H-Cycloprop[e]azulene, decahydro-1,1,7-trimethyl-4-methylene-, [1aR-(1a.alpha.,4a.beta.,7a.alpha.,7b.alpha.)]-

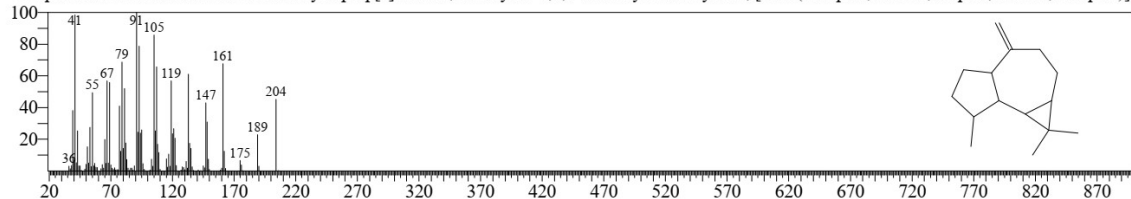

(b)

Library Search

<< Target >>

Line#:1 R.Time:6.170(Scan#:235) MassPeaks:44  
RawMode:Single 6.170(235) BasePeak:93.05(10000)  
BG Mode:None Group 1 - Event 1 Scan

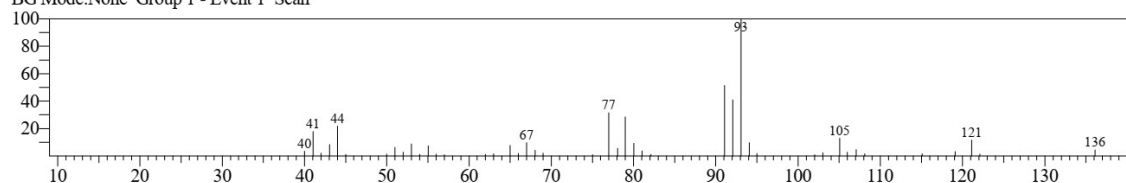

Hit#:1 Entry:6665 Library:NIST11s.lib  
SI:94 Formula:C10H16 CAS:7785-70-8 MolWeight:136 RetIndex:948  
CompName:(1R)-2,6,6-Trimethylbicyclo[3.1.1]hept-2-ene \$\$ 1R.-alpha.-Pinene \$\$ Bicyclo[3.1.1]hept-2-ene, 2,6,6-trimethyl-, (1R)- \$\$ 2,6,6-Trimethylbicy

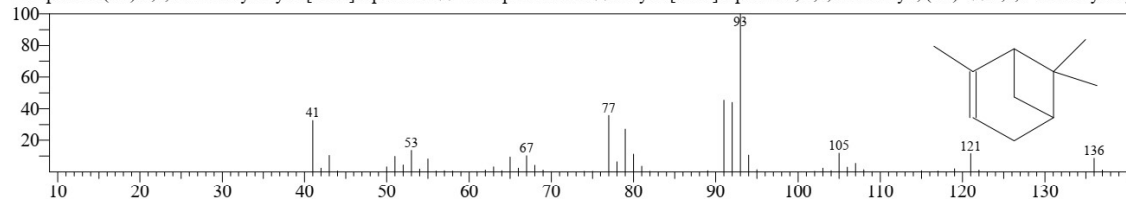

Hit#:2 Entry:9809 Library:NIST11.lib  
SI:93 Formula:C10H16 CAS:80-56-8 MolWeight:136 RetIndex:948  
CompName:alpha.-Pinene \$\$ Bicyclo[3.1.1]hept-2-ene, 2,6,6-trimethyl- \$\$ 2-Pinene \$\$ 2,6,6-Trimethylbicyclo[3.1.1]hept-2-ene \$\$ Pinene, alpha. \$\$ 2,6,6

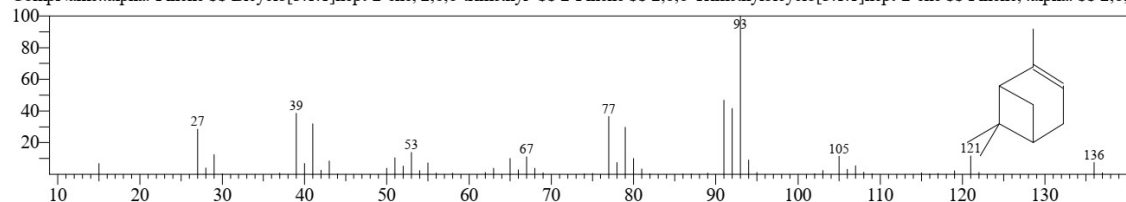

Hit#:3 Entry:6669 Library:NIST11s.lib  
SI:93 Formula:C10H16 CAS:80-56-8 MolWeight:136 RetIndex:948  
CompName:alpha.-Pinene \$\$ Bicyclo[3.1.1]hept-2-ene, 2,6,6-trimethyl- \$\$ 2-Pinene \$\$ 2,6,6-Trimethylbicyclo[3.1.1]hept-2-ene \$\$ Pinene, alpha. \$\$ 2,6,6

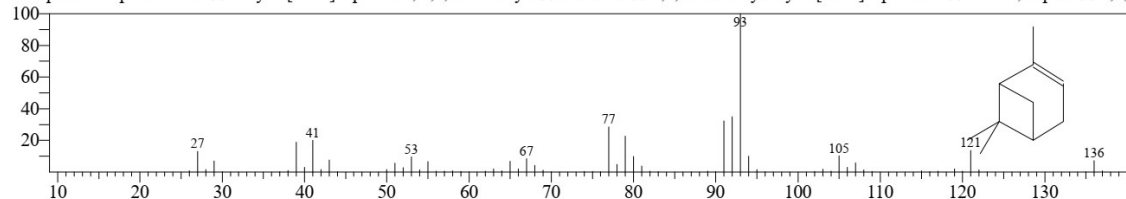

Hit#:4 Entry:6664 Library:NIST11s.lib  
SI:93 Formula:C10H16 CAS:3779-61-1 MolWeight:136 RetIndex:976  
CompName:trans.-beta.-Ocimene \$\$ 1,3,6-Octatriene, 3,7-dimethyl-, (E)- \$\$ .beta.-trans-Ocimene \$\$ trans-3,7-Dimethyl-1,3,6-Octatriene \$\$ Ocimene, trans

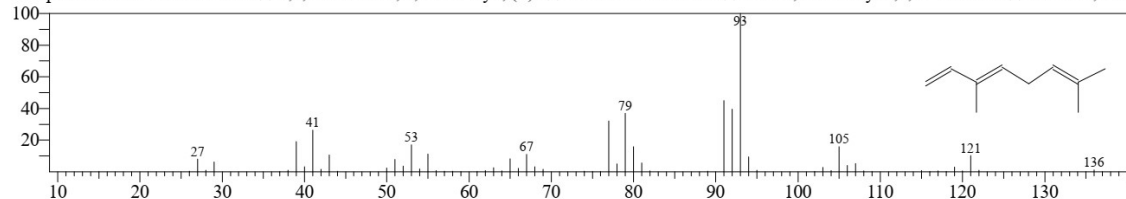

Hit#:5 Entry:9807 Library:NIST11.lib  
SI:92 Formula:C10H16 CAS:13466-78-9 MolWeight:136 RetIndex:948  
CompName:3-Carene \$\$ Bicyclo[4.1.0]hept-3-ene, 3,7,7-trimethyl- \$\$ delta-3-Carene \$\$ 3,7,7-Trimethylbicyclo[4.1.0]hept-3-ene \$\$ .delta. 3-carene \$\$ 3,7

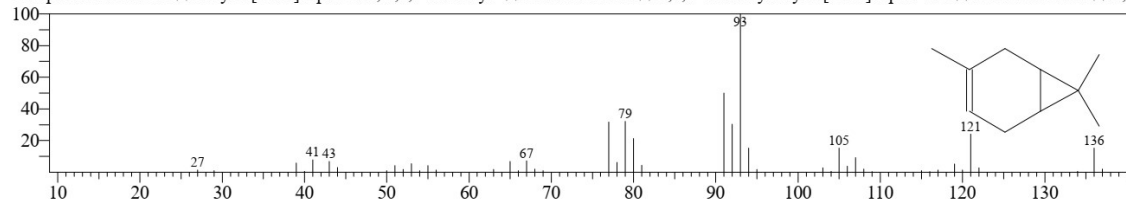

Library Search

<< Target >>

Line#:1 R.Time:7.000(Scan#:401) MassPeaks:39  
RawMode:Single 7.000(401) BasePeak:93.05(10000)  
BG Mode:None Group 1 - Event 1 Scan

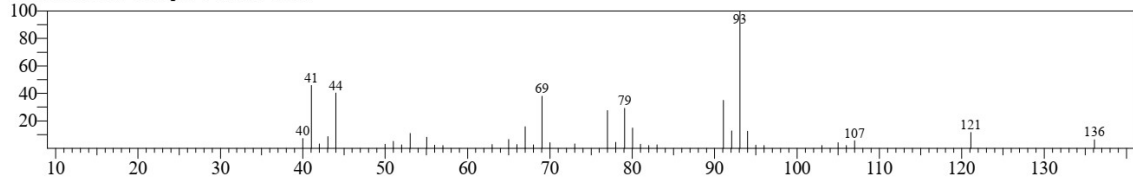

Hit#:1 Entry:9777 Library:NIST11s.lib  
SI:91 Formula:C10H16 CAS:127-91-3 MolWeight:136 RetIndex:943  
CompName:.beta.-Pinene \$\$ Bicyclo[3.1.1]heptane, 6,6-dimethyl-2-methylene- \$\$ 2(10)-Pinene \$\$ Nopinene \$\$ Nopinene \$\$ Pseudopinene \$\$ Pseudopinene

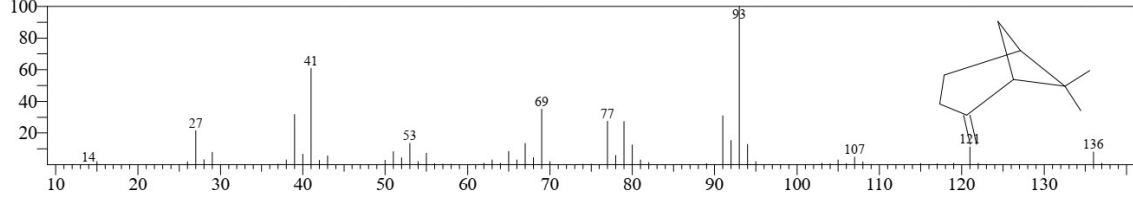

Hit#:2 Entry:6642 Library:NIST11s.lib  
SI:90 Formula:C10H16 CAS:18172-67-3 MolWeight:136 RetIndex:943  
CompName:Bicyclo[3.1.1]heptane, 6,6-dimethyl-2-methylene-, (1S)- \$\$ 2(10)-Pinene, (1S,5S)-(-)- \$\$ (-).beta.-Pinene \$\$ (-)-2(10)-Pinene \$\$ L-.beta.-Piner

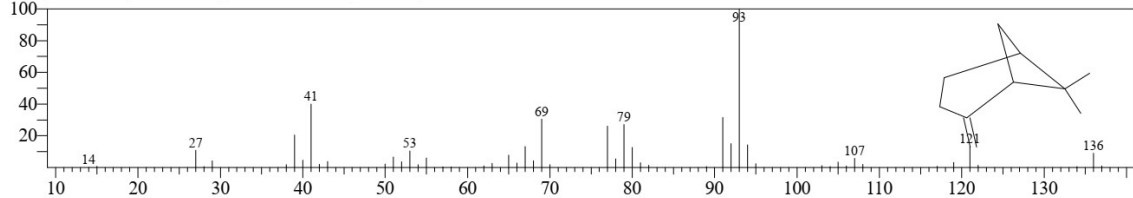

Hit#:3 Entry:6634 Library:NIST11s.lib  
SI:89 Formula:C10H16 CAS:127-91-3 MolWeight:136 RetIndex:943  
CompName:.beta.-Pinene \$\$ Bicyclo[3.1.1]heptane, 6,6-dimethyl-2-methylene- \$\$ 2(10)-Pinene \$\$ Nopinene \$\$ Nopinene \$\$ Pseudopinene \$\$ Pseudopinene

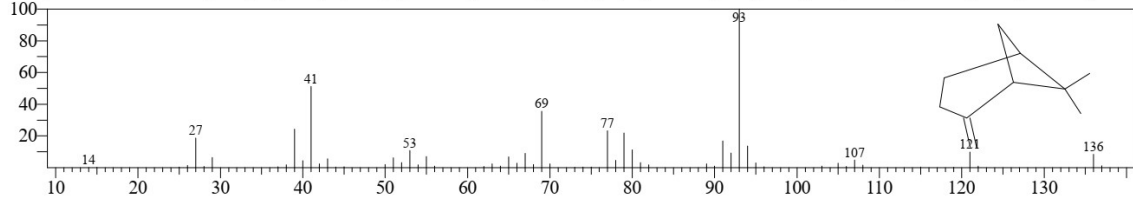

Hit#:4 Entry:6635 Library:NIST11s.lib  
SI:89 Formula:C10H16 CAS:127-91-3 MolWeight:136 RetIndex:943  
CompName:.beta.-Pinene \$\$ Bicyclo[3.1.1]heptane, 6,6-dimethyl-2-methylene- \$\$ 2(10)-Pinene \$\$ Nopinene \$\$ Nopinene \$\$ Pseudopinene \$\$ Pseudopinene

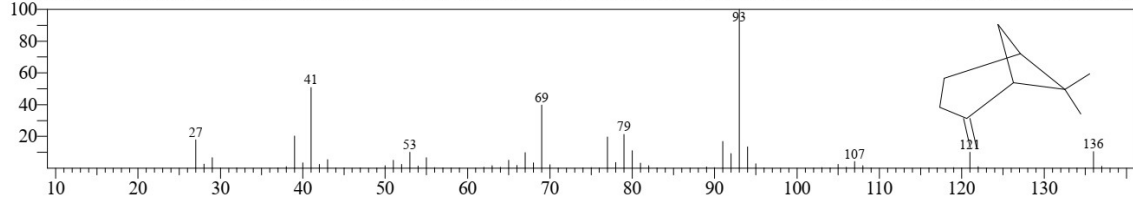

Hit#:5 Entry:6633 Library:NIST11s.lib  
SI:88 Formula:C10H16 CAS:127-91-3 MolWeight:136 RetIndex:943  
CompName:.beta.-Pinene \$\$ Bicyclo[3.1.1]heptane, 6,6-dimethyl-2-methylene- \$\$ 2(10)-Pinene \$\$ Nopinene \$\$ Nopinene \$\$ Pseudopinene \$\$ Pseudopinene

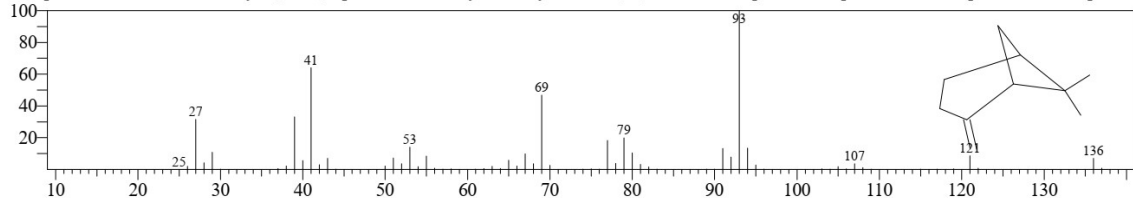

Library Search

<< Target >>

Line#:1 R.Time:19.800(Scan#:2961) MassPeaks:82  
 RawMode:Single 19.800(2961) BasePeak:119.05(10000)  
 BG Mode:None Group 1 - Event 1 Scan

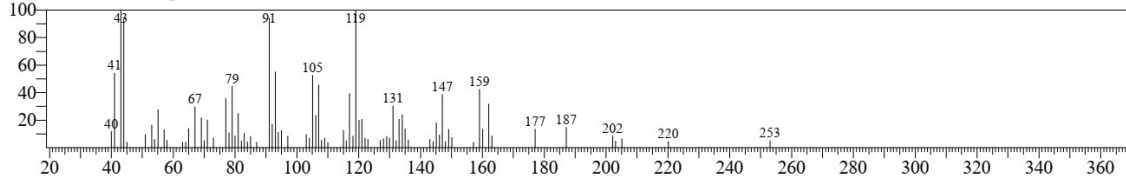

Hit#:1 Entry:20009 Library:NIST11s.lib  
 SI:87 Formula:C15H24O CAS:6750-60-3 MolWeight:220 RetIndex:1536  
 CompName:1H-Cycloprop[e]azulen-7-ol, decahydro-1,1,7-trimethyl-4-methylene-, [1a.r-(1a.alpha.,4a.alpha.,7.beta.,7a.beta.,7b.alpha.)]- S\$ Spathulenol S\$ 1

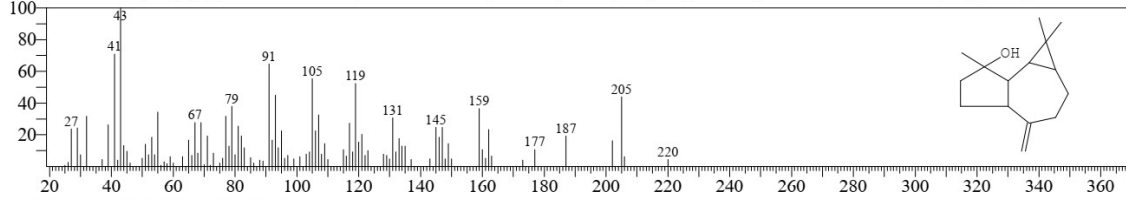

Hit#:2 Entry:57738 Library:NIST11.lib  
 SI:82 Formula:C15H24O CAS:6750-60-3 MolWeight:220 RetIndex:1536  
 CompName:1H-Cycloprop[e]azulen-7-ol, decahydro-1,1,7-trimethyl-4-methylene-, [1a.r-(1a.alpha.,4a.alpha.,7.beta.,7a.beta.,7b.alpha.)]- S\$ Spathulenol S\$ 1

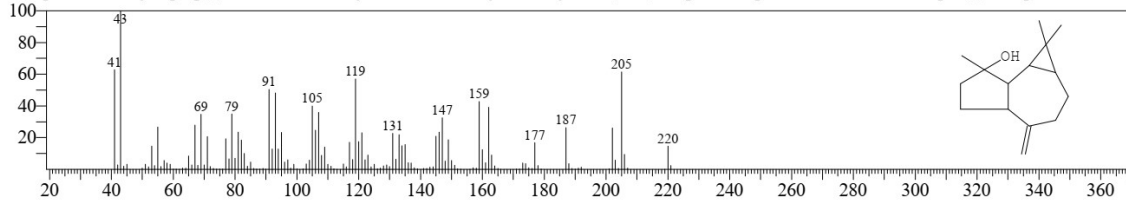

Hit#:3 Entry:57734 Library:NIST11.lib  
 SI:81 Formula:C15H24O CAS:77171-55-2 MolWeight:220 RetIndex:1536  
 CompName:(-)-Spathulenol S\$ 1H-Cycloprop[e]azulen-7-ol, decahydro-1,1,7-trimethyl-4-methylene-, [1a.S-(1a.alpha.,4a.alpha.,7.beta.)] S\$ Ent-Spathulenol

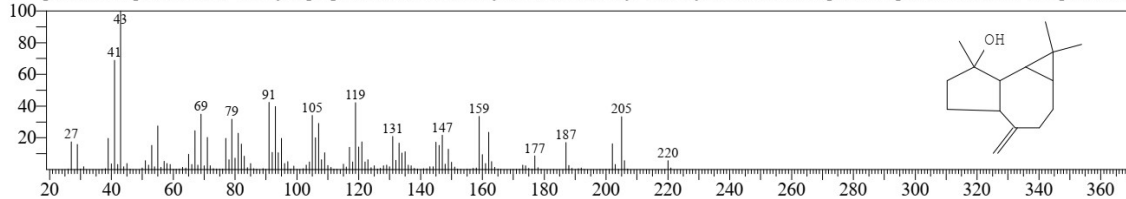

Hit#:4 Entry:155597 Library:NIST11.lib  
 SI:79 Formula:C20H30O5 CAS:5508-58-7 MolWeight:350 RetIndex:2944  
 CompName:Andrographolide S\$ 2(3H)-Furanone, 3-[2-[decahydro-6-hydroxy-5-(hydroxymethyl)-5,8a-dimethyl-2-methylene-1-naphthalenyl]ethylidene]dih

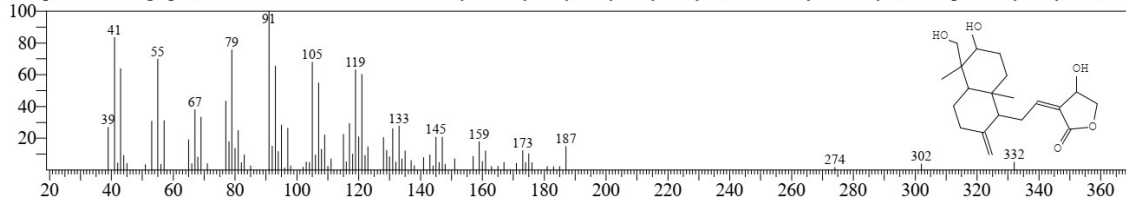

Hit#:5 Entry:163150 Library:NIST11.lib  
 SI:78 Formula:C22H34O4 CAS:28393-02-4 MolWeight:362 RetIndex:2956  
 CompName:10,12-Docosadiynoic acid S\$ 10,12-Docosadiynoic acid # S\$

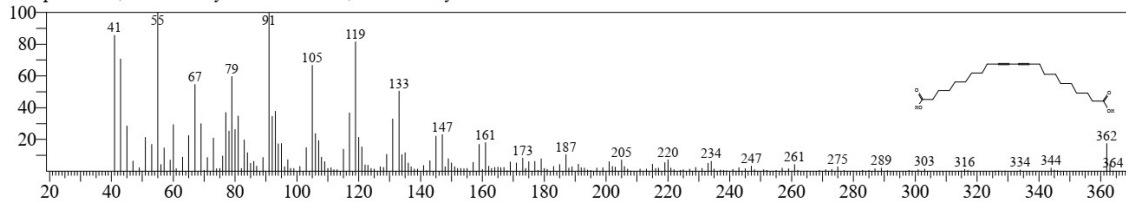

Library Search

<< Target >>

Line#:1 R.Time:25.615(Scan#:4124) MassPeaks:132  
RawMode:Single 25.615(4124) BasePeak:69.05(10000)  
BG Mode:None Group 1 - Event 1 Scan

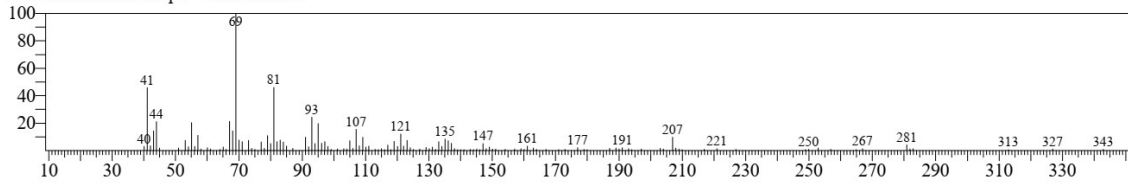

Hit#:1 Entry:110905 Library:NIST11.lib  
SI:89 Formula:C20H34O CAS:24034-73-9 MolWeight:290 RetIndex:2192  
CompName:trans-Geranylgeraniol SS 2,6,10,14-Hexadecatetraen-1-ol, 3,7,11,15-tetramethyl-, (E,E,E)- SS All-trans-Geranylgeraniol SS

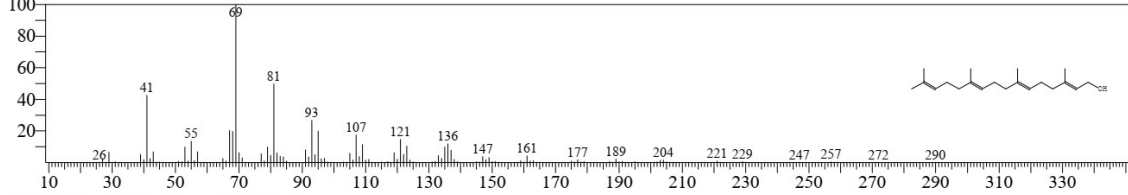

Hit#:2 Entry:20278 Library:NIST11s.lib  
SI:88 Formula:C15H26O CAS:4602-84-0 MolWeight:222 RetIndex:1710  
CompName:2,6,10-Dodecatrien-1-ol, 3,7,11-trimethyl- SS Farnesol SS Farnesyl alcohol SS 3,7,11-Trimethyl-2,6,10-dodecatrien-1-ol SS 3,7,11-Trimethyl-2,

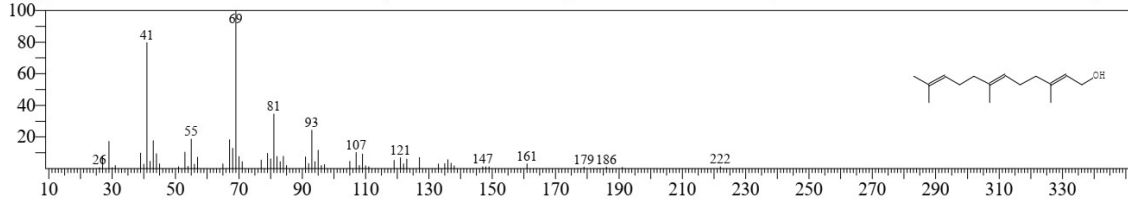

Hit#:3 Entry:25623 Library:NIST11s.lib  
SI:87 Formula:C20H34O CAS:24034-73-9 MolWeight:290 RetIndex:2192  
CompName:trans-Geranylgeraniol SS 2,6,10,14-Hexadecatetraen-1-ol, 3,7,11,15-tetramethyl-, (E,E,E)- SS All-trans-Geranylgeraniol SS

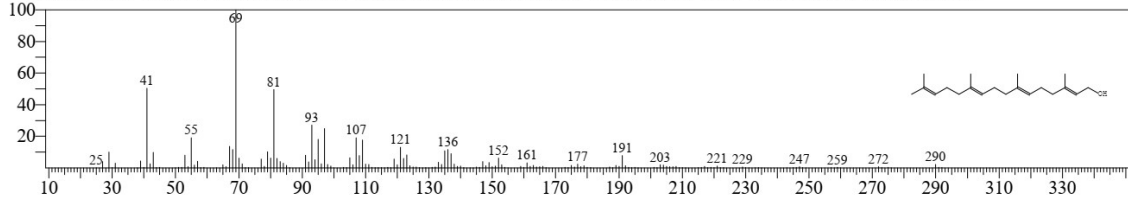

Hit#:4 Entry:110903 Library:NIST11.lib  
SI:87 Formula:C20H34O CAS:1113-21-9 MolWeight:290 RetIndex:2046  
CompName:1,6,10,14-Hexadecatetraen-3-ol, 3,7,11,15-tetramethyl-, (E,E)- SS (6E,10E)-3,7,11,15-Tetramethyl-1,6,10,14-hexadecatetraen-3-ol # SS Geranyl

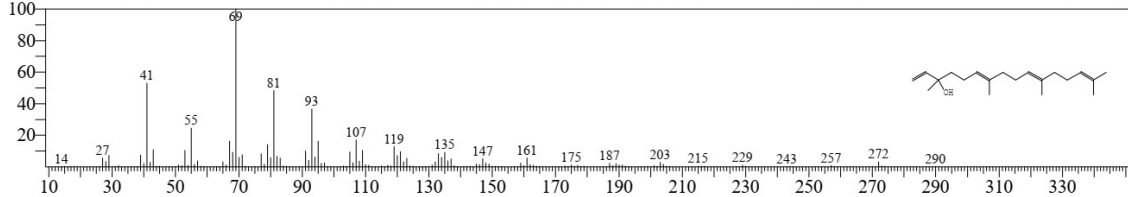

Hit#:5 Entry:110904 Library:NIST11.lib  
SI:87 Formula:C20H34O CAS:7614-21-3 MolWeight:290 RetIndex:2192  
CompName:Hexadeca-2,6,10,14-tetraen-1-ol, 3,7,11,16-tetramethyl- SS 3,7,11,15-Tetramethyl-2,6,10,14-hexadecatetraen-1-ol SS Tetraprenol SS

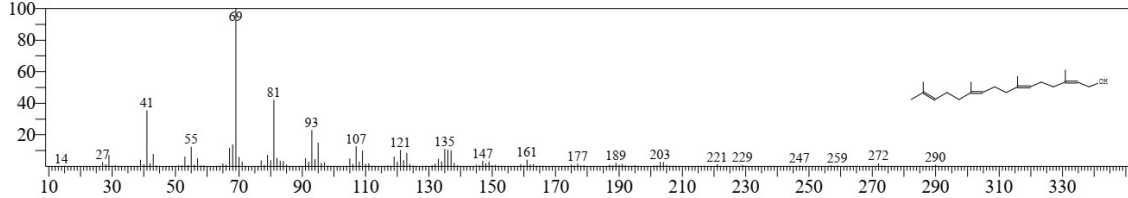

(c)

Library Search

<< Target >>

Line#:1 R.Time:22.925(Scan#:3586) MassPeaks:183

RawMode:Single 22.925(3586) BasePeak:44.05(10000)

BG Mode:None Group 1 - Event 1 Scan

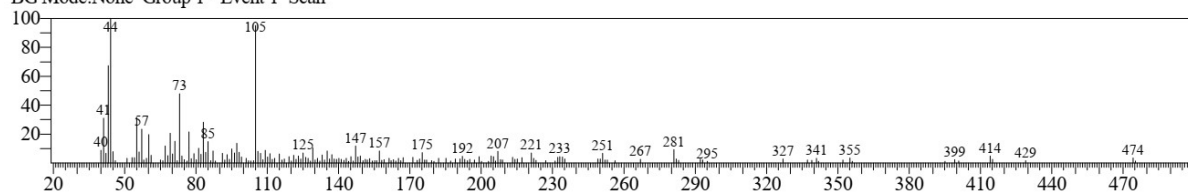

Hit#:1 Entry:195613 Library:NIST11.lib

SI:75 Formula:C28H44O4 CAS:56599-45-2 MolWeight:444 RetIndex:3238

CompName:9-Octadecenoic acid, (2-phenyl-1,3-dioxolan-4-yl)methyl ester, cis- SS (2-Phenyl-1,3-dioxolan-4-yl)methyl 9-octadecenoate, cis- SS

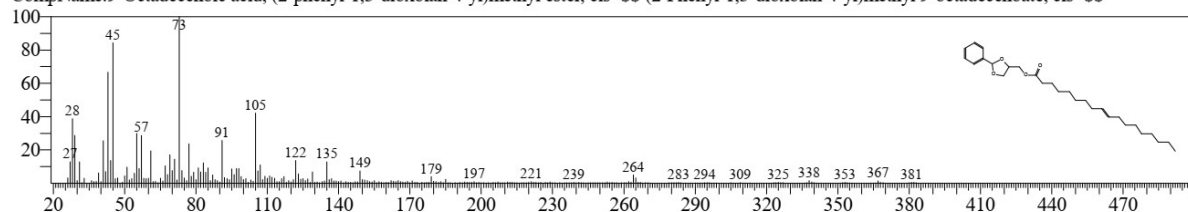

Hit#:2 Entry:196084 Library:NIST11.lib

SI:75 Formula:C28H46O4 CAS:56599-88-3 MolWeight:446 RetIndex:3230

CompName:Octadecanoic acid, (2-phenyl-1,3-dioxolan-4-yl)methyl ester, cis- SS (2-Phenyl-1,3-dioxolan-4-yl)methyl stearate # SS

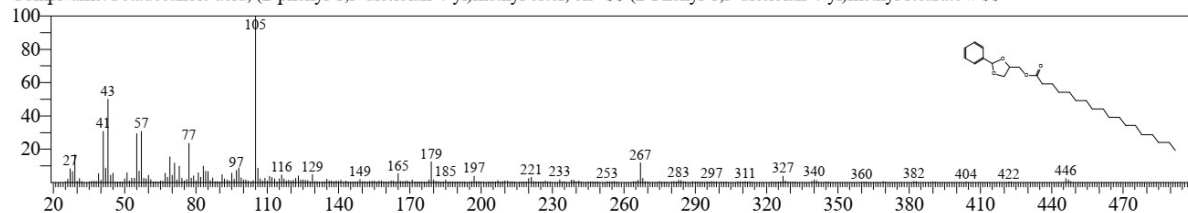

Hit#:3 Entry:65115 Library:NIST11.lib

SI:75 Formula:C14H14O3 CAS:56881-08-4 MolWeight:230 RetIndex:1987

CompName:7-Hydroxy-3-(1,1-dimethylprop-2-enyl)coumarin SS 3-(1,1-Dimethyl-2-propenyl)-7-hydroxy-2H-chromen-2-one # SS

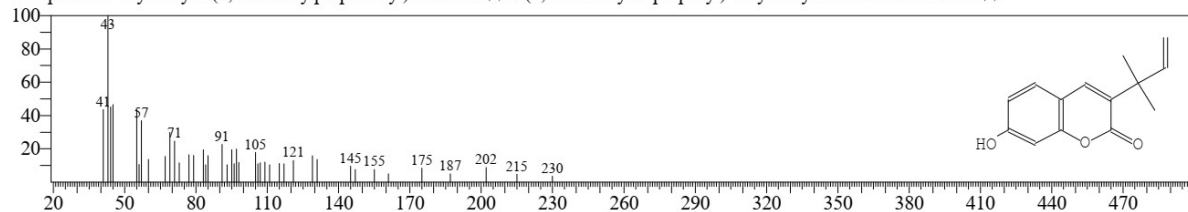

Hit#:4 Entry:71579 Library:NIST11.lib

SI:71 Formula:C8H16O8 CAS:0-00-0 MolWeight:240 RetIndex:2221

CompName:l-Gala-l-ido-octose SS Octose # SS

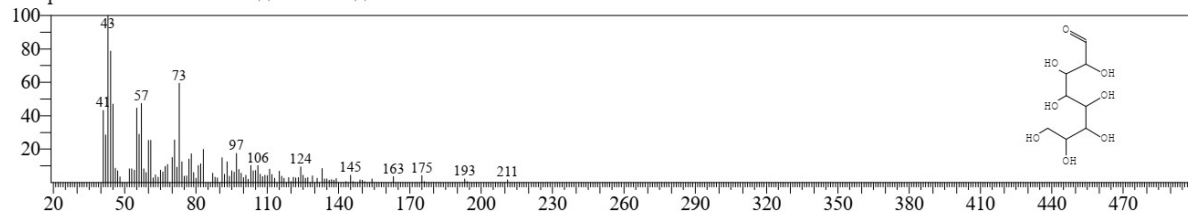

Hit#:5 Entry:204708 Library:NIST11.lib

SI:70 Formula:C30H44O6 CAS:125596-54-5 MolWeight:500 RetIndex:3635

CompName:Cucurbitacin b, 25-desacetoxy- SS 2,16-Dihydroxy-17-[(3E)-1-hydroxy-1,5-dimethyl-2-oxo-3-hexenyl]-4,4,9,14-tetramethylestr-5-ene-3,11-dio

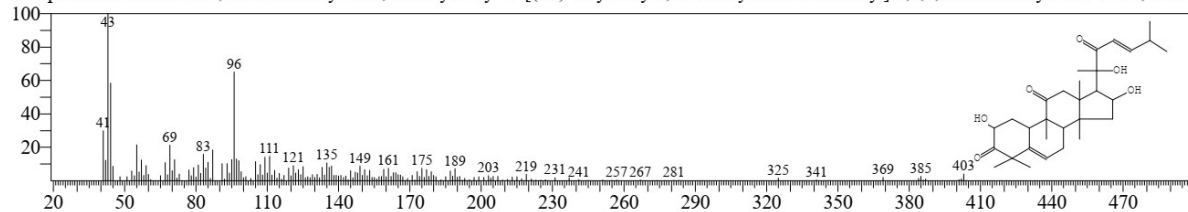

Library Search

<< Target >>

Line#:1 R.Time:23.640(Scan#:3729) MassPeaks:115

RawMode:Single 23.640(3729) BasePeak:44.05(10000)

BG Mode:None Group 1 - Event 1 Scan

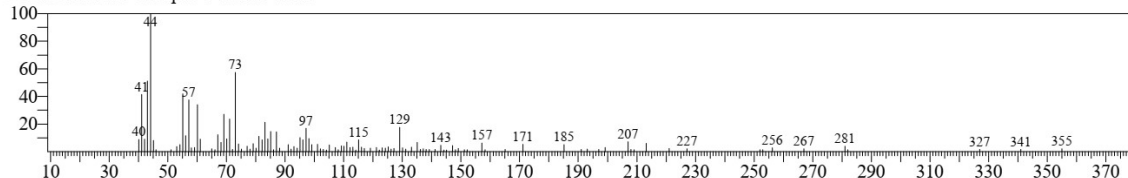

Hit#:1 Entry:169171 Library:NIST11.lib

SI:80 Formula:C22H44O4 CAS:106-11-6 MolWeight:372 RetIndex:2694

CompName:Octadecanoic acid, 2-(2-hydroxyethoxy)ethyl ester \$S Aqua Cera \$S Atlas G 2146 \$S Cerasynt \$S Cerasynt Special \$S Clindrol SDG \$S Diethyl

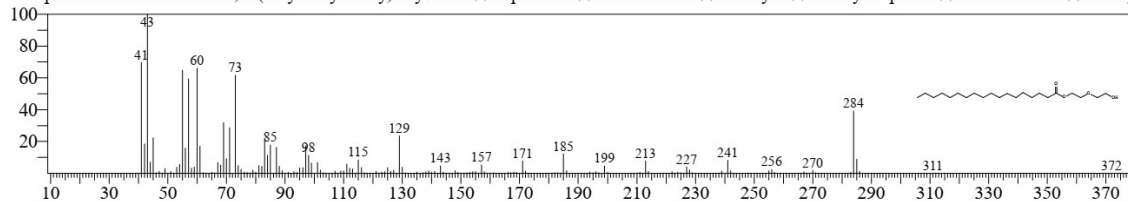

Hit#:2 Entry:15394 Library:NIST11s.lib

SI:80 Formula:C11H22O2 CAS:112-37-8 MolWeight:186 RetIndex:1471

CompName:Undecanoic acid \$S n-Undecanoic acid \$S n-Undecoic acid \$S n-Undecylic acid \$S Hendecanoic acid \$S Undecylic acid \$S 1-Decanecarboxylic

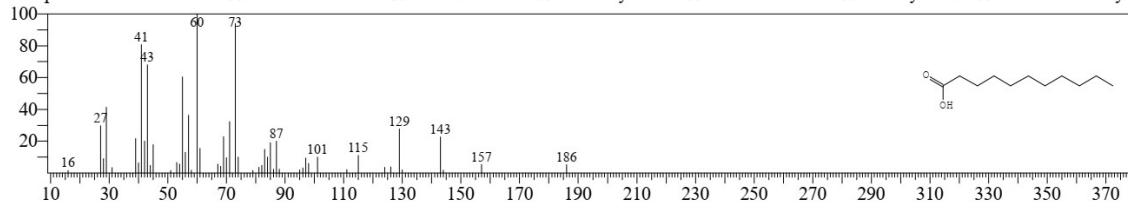

Hit#:3 Entry:35174 Library:NIST11.lib

SI:79 Formula:C11H22O2 CAS:112-37-8 MolWeight:186 RetIndex:1471

CompName:Undecanoic acid \$S n-Undecanoic acid \$S n-Undecoic acid \$S n-Undecylic acid \$S Hendecanoic acid \$S Undecylic acid \$S 1-Decanecarboxylic

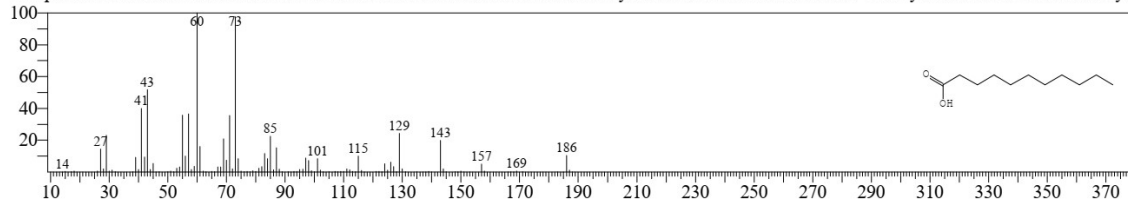

Hit#:4 Entry:28080 Library:NIST11s.lib

SI:79 Formula:C22H44O2 CAS:112-85-6 MolWeight:340 RetIndex:2564

CompName:Docosanoic acid \$S n-Docosanoic acid \$S Behenic acid \$S Glycon B-70 \$S Hydrofol Acid 560 \$S Hydrofol 2022-55 \$S 1-Docosanoic acid \$S

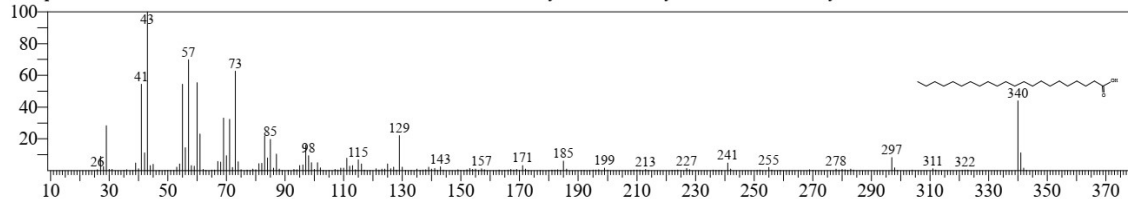

Hit#:5 Entry:53599 Library:NIST11.lib

SI:78 Formula:C13H26O2 CAS:638-53-9 MolWeight:214 RetIndex:1670

CompName:Tridecanoic acid \$S n-Tridecanoic acid \$S n-Tridecoic acid \$S Tridecylic acid \$S

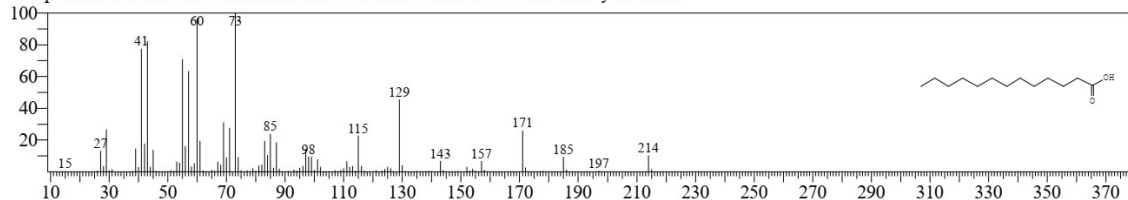



Library Search

<< Target >>

Line#:1 R.Time:23.935(Scan#:3788) MassPeaks:172  
RawMode:Single 23.935(3788) BasePeak:95.05(10000)  
BG Mode:None Group 1 - Event 1 Scan

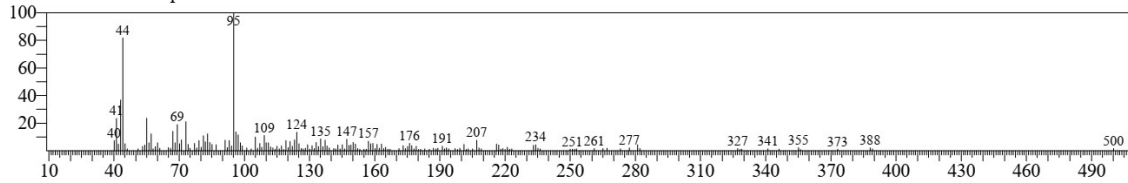

Hit#:1 Entry:32965 Library:NIST11.lib  
SI:72 Formula:C12H22O CAS:77142-78-0 MolWeight:182 RetIndex:1203  
CompName:5,7-Octadien-3-ol, 2,4,4,7-tetramethyl-, (E)- SS (5E)-2,4,4,7-Tetramethyl-5,7-octadien-3-ol # SS

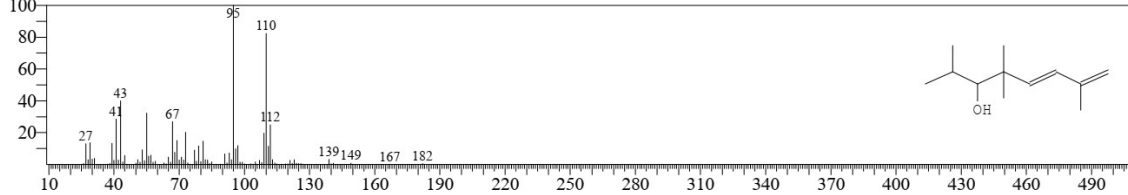

Hit#:2 Entry:18695 Library:NIST11.lib  
SI:72 Formula:C10H20O CAS:13674-19-6 MolWeight:156 RetIndex:1219  
CompName:Cyclohexanemethanol, 4-(1-methylethyl)-, trans- SS p-Menthan-7-ol, trans- SS trans-p-Menthan-7-ol SS (4-Isopropylcyclohexyl)methanol, (E)- S

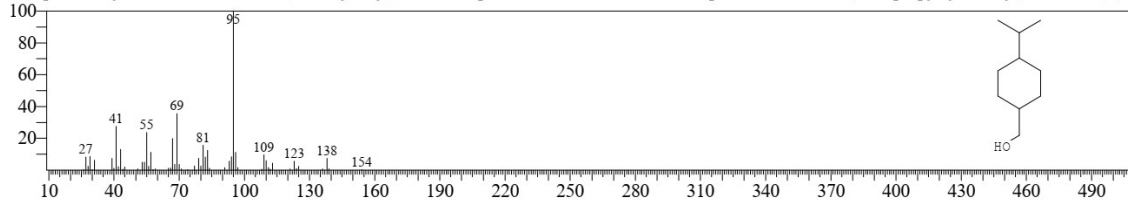

Hit#:3 Entry:18690 Library:NIST11.lib  
SI:71 Formula:C10H20O CAS:13828-37-0 MolWeight:156 RetIndex:1219  
CompName:Cyclohexanemethanol, 4-(1-methylethyl)-, cis- SS p-Methan-7-ol, cis- SS (4-Isopropylcyclohexyl)methanol, (Z)- S

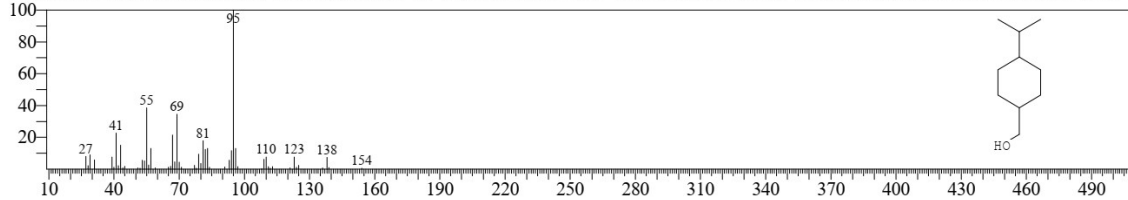

Hit#:4 Entry:30371 Library:NIST11.lib  
SI:71 Formula:C11H18Si CAS:0-00-0 MolWeight:178 RetIndex:1021  
CompName:Vinyltris(cyclopropyl)silane SS Tricycpropyl(vinyl)silane # SS

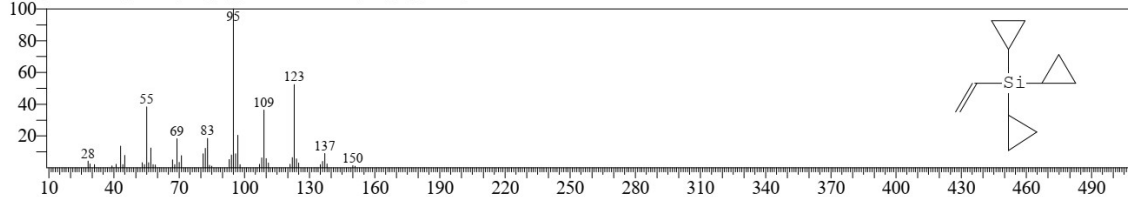

Hit#:5 Entry:23615 Library:NIST11.lib  
SI:71 Formula:C11H18O CAS:0-00-0 MolWeight:166 RetIndex:1197  
CompName:2,6-Dimethyl-1-nonen-3-yn-5-ol

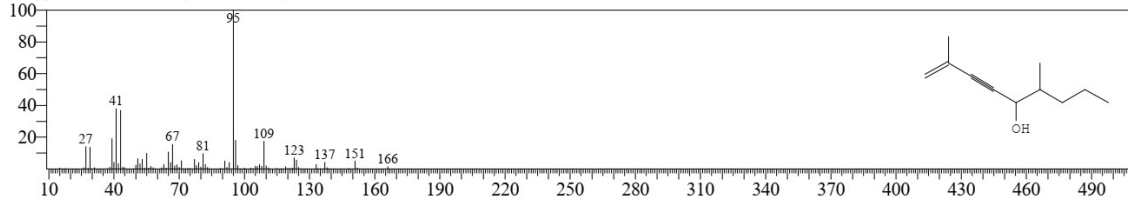

Library Search

<< Target >>

Line#:1 R.Time:24.900(Scan#:3981) MassPeaks:172

RawMode:Single 24.900(3981) BasePeak:55.10(10000)

BG Mode:None Group 1 - Event 1 Scan

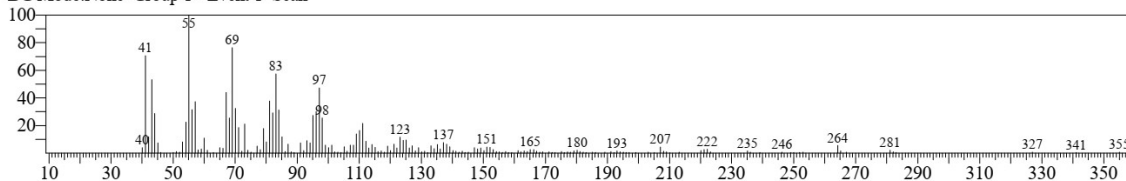

Hit#:1 Entry:25039 Library:NIST11s.lib

SI:92 Formula:C18H34O2 CAS:112-80-1 MolWeight:282 RetIndex:2175

CompName:Oleic Acid \$ 9-Octadecenoic acid (Z)- \$ .DELTA.9-cis-Oleic acid \$ cis-Oleic Acid \$ cis-9-Octadecenoic Acid \$ Emersol 211 \$ Emersol :

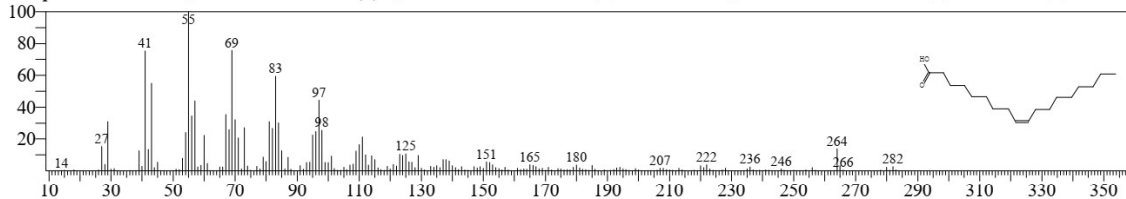

Hit#:2 Entry:104412 Library:NIST11.lib

SI:90 Formula:C18H34O2 CAS:506-17-2 MolWeight:282 RetIndex:2175

CompName:cis-Vaccenic acid \$ 11-Octadecenoic acid, (Z)- \$ (Z)-11-Octadecenoic acid \$

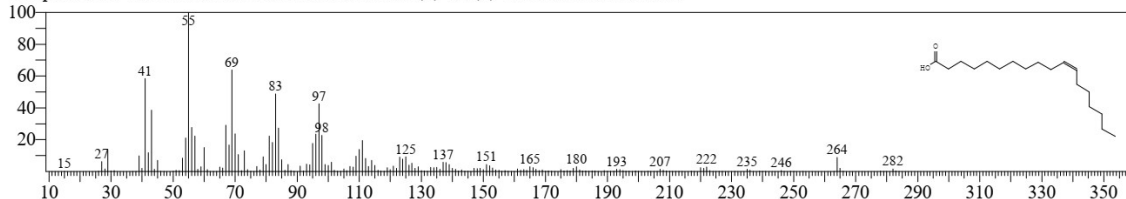

Hit#:3 Entry:70898 Library:NIST11.lib

SI:90 Formula:C16H30O CAS:56219-04-6 MolWeight:238 RetIndex:1808

CompName:cis-9-Hexadecenal \$ 9-Hexadecenal, (Z)- \$ (Z)-9-Hexadecenal \$ Z-9-Hexadecenal \$ (9Z)-9-Hexadecenal # \$

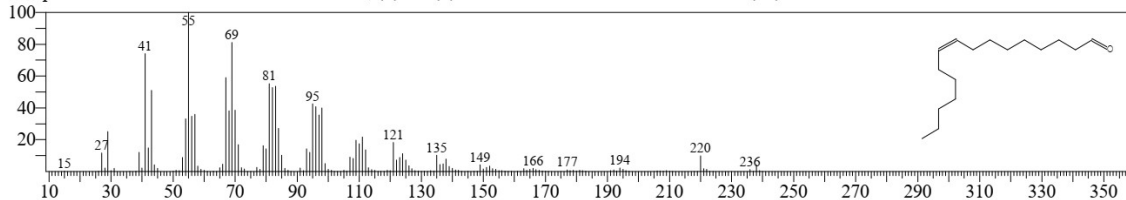

Hit#:4 Entry:91949 Library:NIST11.lib

SI:90 Formula:C18H34O CAS:2423-10-1 MolWeight:266 RetIndex:2007

CompName:9-Octadecenal, (Z)- \$ Olealdehyde \$ cis-9-Octadecenal \$ Oleylaldehyde \$ Z-9-Octadecenal \$ (9Z)-9-Octadecenal # \$

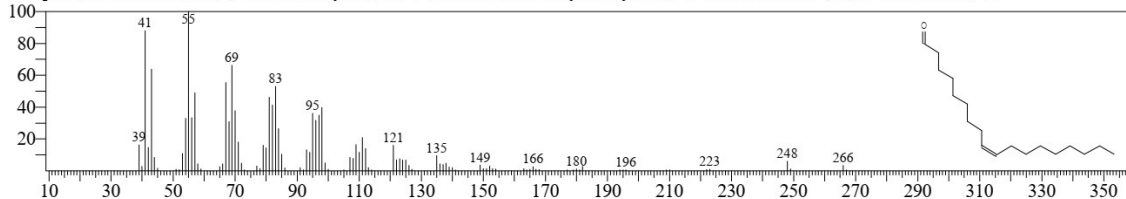

Hit#:5 Entry:115406 Library:NIST11.lib

SI:90 Formula:C19H36O2 CAS:73033-09-7 MolWeight:296 RetIndex:2274

CompName:cis-10-Nonadecenoic acid

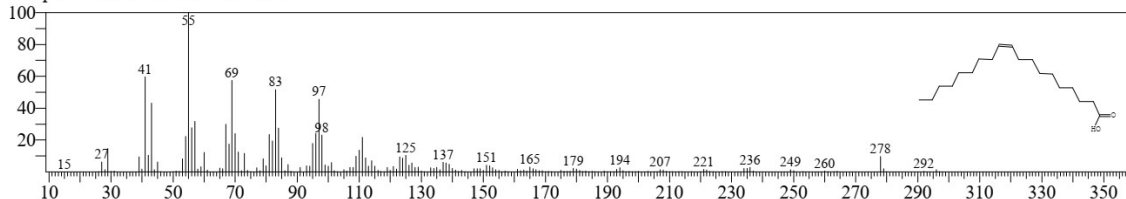

## Library Search

&lt;&lt; Target &gt;&gt;

Line#:1 R.Time:26.860(Scan#:4373) MassPeaks:291  
RawMode:Single 26.860(4373) BasePeak:105.05(10000)  
BG Mode:None Group 1 - Event 1 Scan

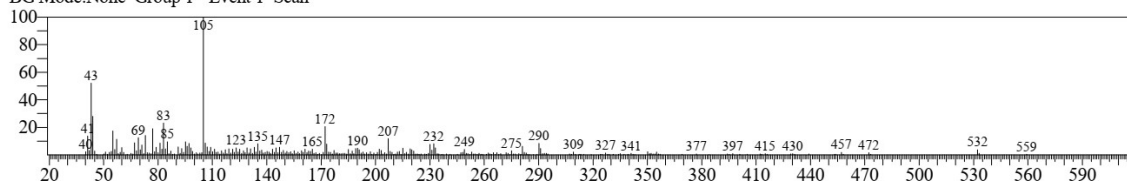

Hit#:1 Entry:196084 Library:NIST11.lib

SI:70 Formula:C28H46O4 CAS:56599-88-3 MolWeight:446 RetIndex:3230

CompName:Octadecanoic acid, (2-phenyl-1,3-dioxolan-4-yl)methyl ester, cis- SS (2-Phenyl-1,3-dioxolan-4-yl)methyl stearate # SS

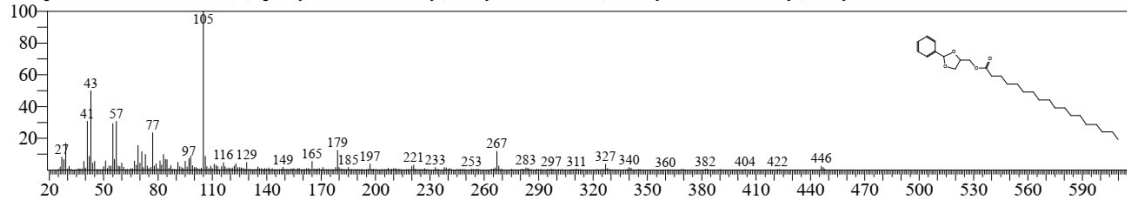

Hit#:2 Entry:208114 Library:NIST11.lib

SI:68 Formula:C37H52O3 CAS:0-00-0 MolWeight:544 RetIndex:3726

CompName:Carpersterol dehydrate SS (2Z)-4-Methyl-6-oxostigmasta-7,20(22)-dien-3-yl benzoate # SS

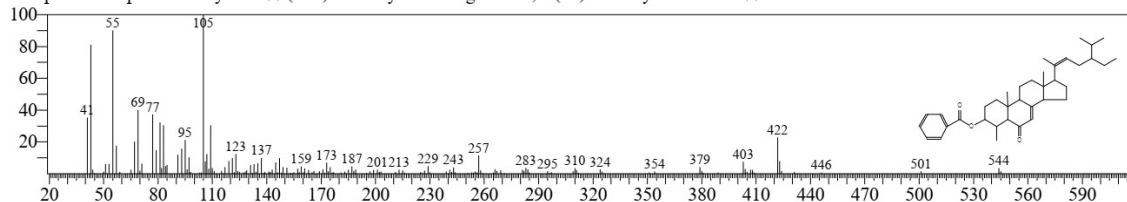

Hit#:3 Entry:209017 Library:NIST11.lib

SI:67 Formula:C37H54O4 CAS:0-00-0 MolWeight:562 RetIndex:3839

CompName:Isocarpersterol SS 22-Hydroxy-4-methyl-6-oxostigmast-7-en-3-yl benzoate # SS

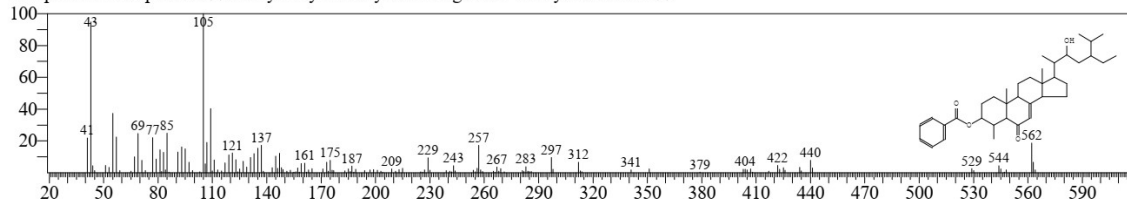

Hit#:4 Entry:211068 Library:NIST11.lib

SI:67 Formula:C39H56O7 CAS:0-00-0 MolWeight:636 RetIndex:4279

CompName:9,14-Dihydroxy-22-O-acetylcarpersterol SS 22-(Acetyloxy)-9,14-dihydroxy-4-methyl-6-oxostigmast-7-en-3-yl benzoate # SS

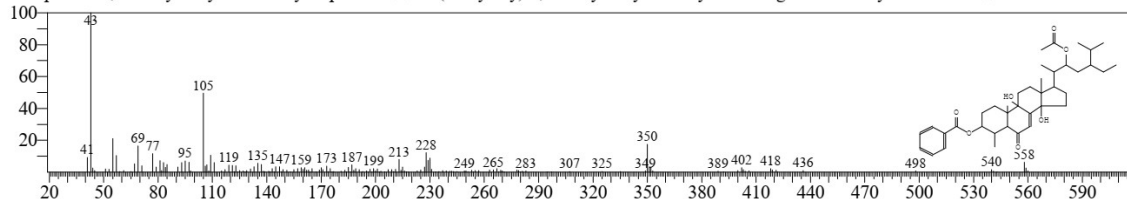

Hit#:5 Entry:180829 Library:NIST11.lib

SI:66 Formula:C26H36O3 CAS:0-00-0 MolWeight:396 RetIndex:2956

CompName:3-Isopropyl-6a,10b-dimethyl-8-(2-oxo-2-phenyl-ethyl)-dodecahydro-benzo[f]chromen-7-one SS 3-Isopropyl-6a,10b-dimethyl-8-(2-oxo-2-phenyl

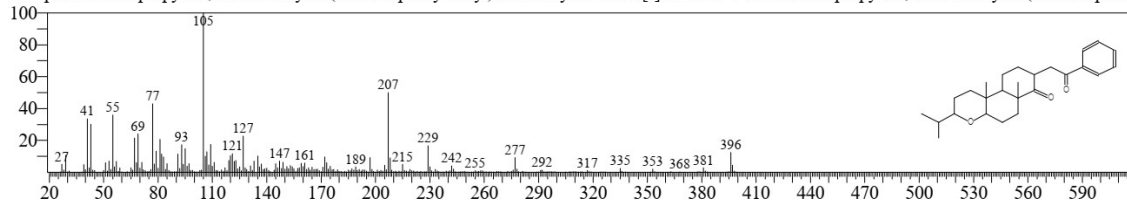

Library Search

<< Target >>

Line#:1 R.Time:28.150(Scan#:4631) MassPeaks:295  
 RawMode:Single 28.150(4631) BasePeak:105.05(10000)  
 BG Mode:None Group 1 - Event 1 Scan

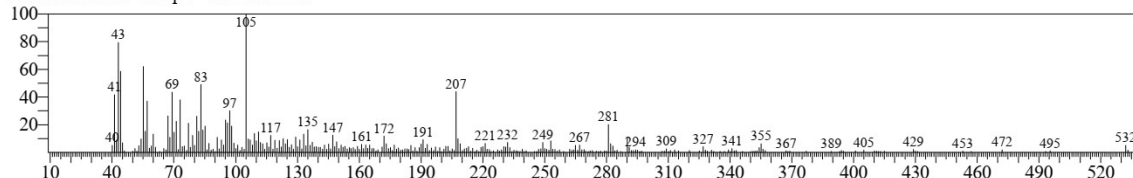

Hit#:1 Entry:193586 Library:NIST11.lib  
 SI:76 Formula:C26H44O5 CAS:0-00-0 MolWeight:436 RetIndex:3094  
 CompName:Ethyl iso-allocholate \$\$ Ethyl 3,7,12-trihydroxycholan-24-oate # \$\$

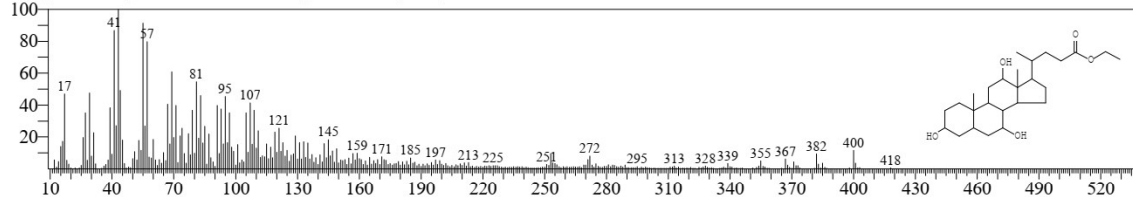

Hit#:2 Entry:30676 Library:NIST11s.lib  
 SI:75 Formula:C40H56 CAS:7235-40-7 MolWeight:536 RetIndex:3978  
 CompName:.beta. Carotene \$\$ .beta.-Carotene \$\$ .beta.-Carotene, all-trans- \$\$ all-trans-.beta.-Carotene \$\$ Cyclohexene, 1,1'-(3,7,12,16-tetramethyl-1

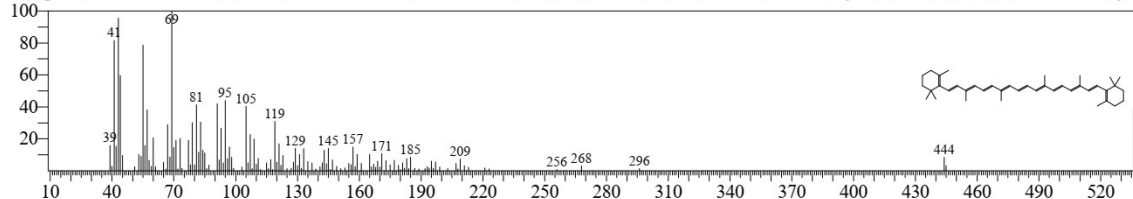

Hit#:3 Entry:96896 Library:NIST11.lib  
 SI:73 Formula:C17H33Cl CAS:56554-80-4 MolWeight:272 RetIndex:1944  
 CompName:8-Heptadecene, 1-chloro- \$\$ (8E)-1-Chloro-8-heptadecene # \$\$

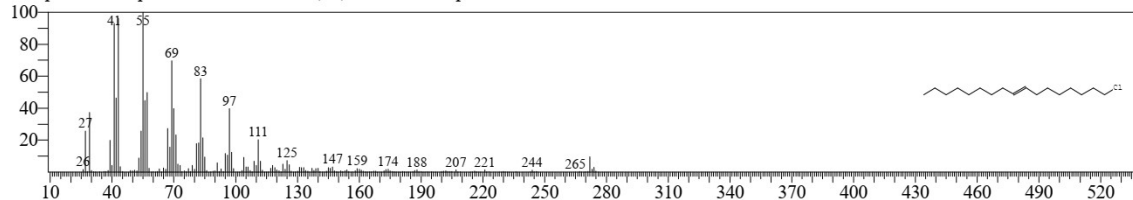

Hit#:4 Entry:65115 Library:NIST11.lib  
 SI:73 Formula:C14H14O3 CAS:56881-08-4 MolWeight:230 RetIndex:1987  
 CompName:7-Hydroxy-3-(1,1-dimethylprop-2-enyl)coumarin \$\$ 3-(1,1-Dimethyl-2-propenyl)-7-hydroxy-2H-chromen-2-one # \$\$

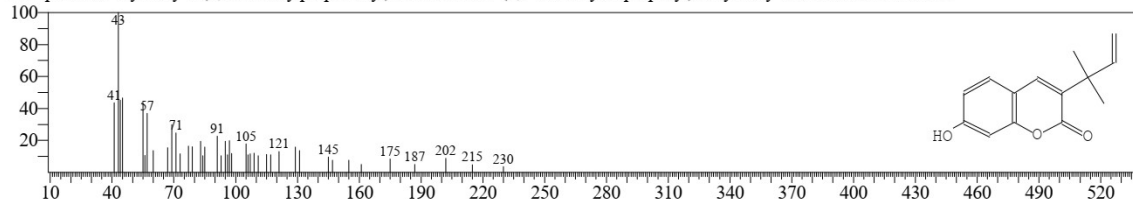

Hit#:5 Entry:96894 Library:NIST11.lib  
 SI:72 Formula:C17H33Cl CAS:56554-78-0 MolWeight:272 RetIndex:1944  
 CompName:7-Heptadecene, 1-chloro- \$\$ (7E)-1-Chloro-7-heptadecene # \$\$

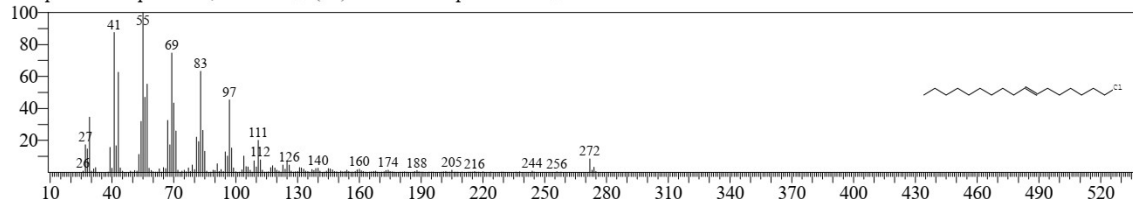

Figure SI-2. GC-MS analysis data of BL (a), BS (b) and BSc (c) extracts

(a)

Savitribai Phule Pune University - Central Instrumentation Facility

Analysis Info

Analysis Name D:\Data\2021\JULY\SPPU CAMPUS\DEPT OF CHEM\PROF. BALAPRASAD  
ANKAMWAR\BL\_RB4\_01\_2899.d  
Method dlc\_ms50-1500mz\_10min\_0.120mlflow\_90b.m  
Sample Name BL  
Comment

Acquisition Date 7/28/2021 5:48:49 PM  
Operator CIF  
Instrument impact HD 1819696.00184

Acquisition Parameter

|             |          |                      |          |                  |           |
|-------------|----------|----------------------|----------|------------------|-----------|
| Source Type | ESI      | Ion Polarity         | Positive | Set Nebulizer    | 1.7 Bar   |
| Focus       | Active   | Set Capillary        | 4500 V   | Set Dry Heater   | 200 °C    |
| Scan Begin  | 50 m/z   | Set End Plate Offset | -500 V   | Set Dry Gas      | 7.0 l/min |
| Scan End    | 1500 m/z | Set Charging Voltage | 2000 V   | Set Divert Valve | Source    |
|             |          | Set Corona           | 0 nA     | Set APCI Heater  | 0 °C      |

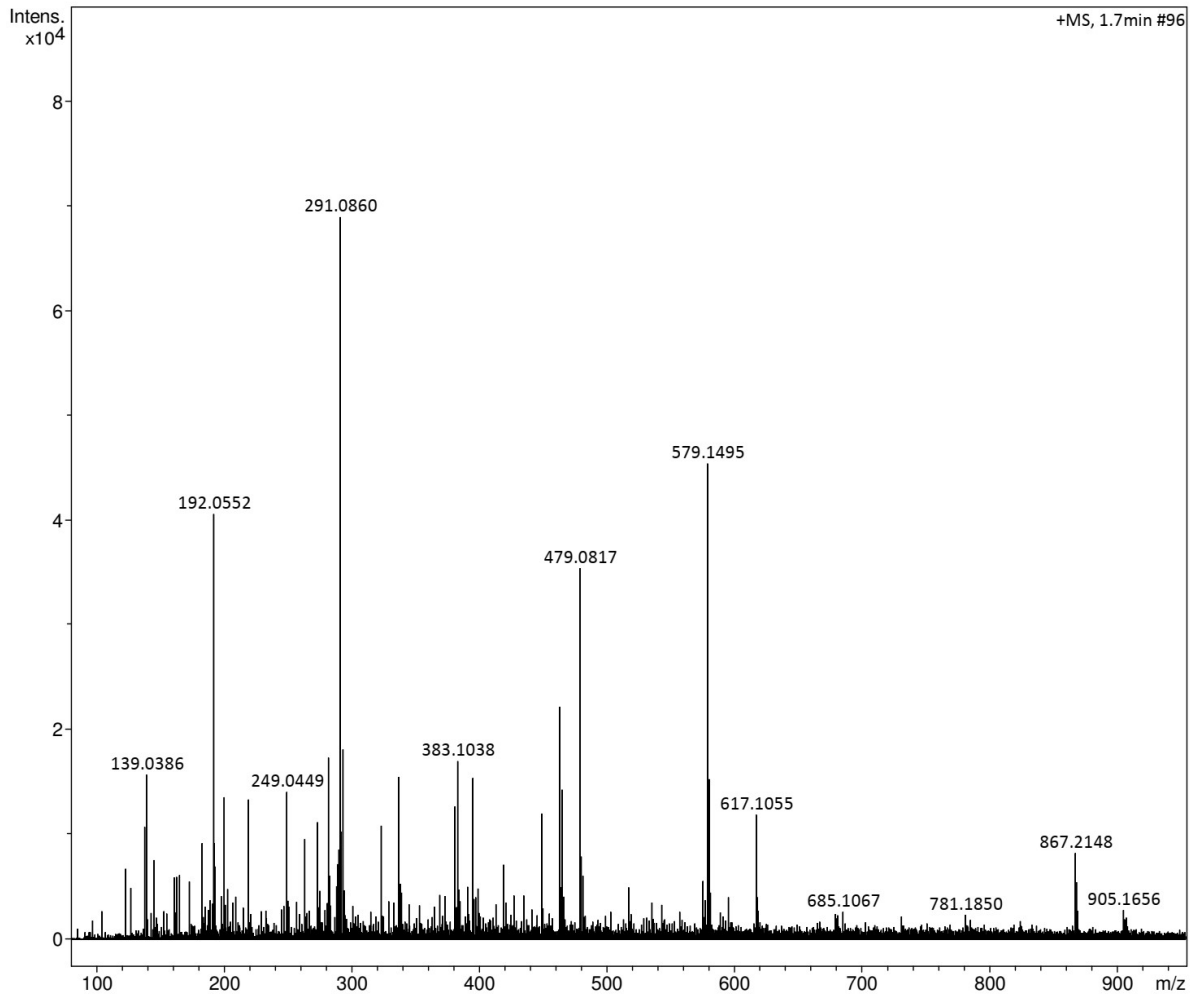

(b)

Savitribai Phule Pune University - Central Instrumentation Facility

Analysis Info

Analysis Name D:\Data\2021\JULY\SPPU CAMPUS\DEPT OF CHEM\PROF. BALAPRASAD  
AN KAMWAR\BS\_RB3\_01\_2898.d  
Method dlc\_ms50-1500mz\_10min\_0.120mlflow\_90b.m  
Sample Name BS  
Comment

Acquisition Date 7/28/2021 5:38:11 PM  
Operator CIF  
Instrument impact HD 1819696.00184

Acquisition Parameter

|             |          |                      |          |                  |           |
|-------------|----------|----------------------|----------|------------------|-----------|
| Source Type | ESI      | Ion Polarity         | Positive | Set Nebulizer    | 1.7 Bar   |
| Focus       | Active   | Set Capillary        | 4500 V   | Set Dry Heater   | 200 °C    |
| Scan Begin  | 50 m/z   | Set End Plate Offset | -500 V   | Set Dry Gas      | 7.0 l/min |
| Scan End    | 1500 m/z | Set Charging Voltage | 2000 V   | Set Divert Valve | Source    |
|             |          | Set Corona           | 0 nA     | Set APCI Heater  | 0 °C      |

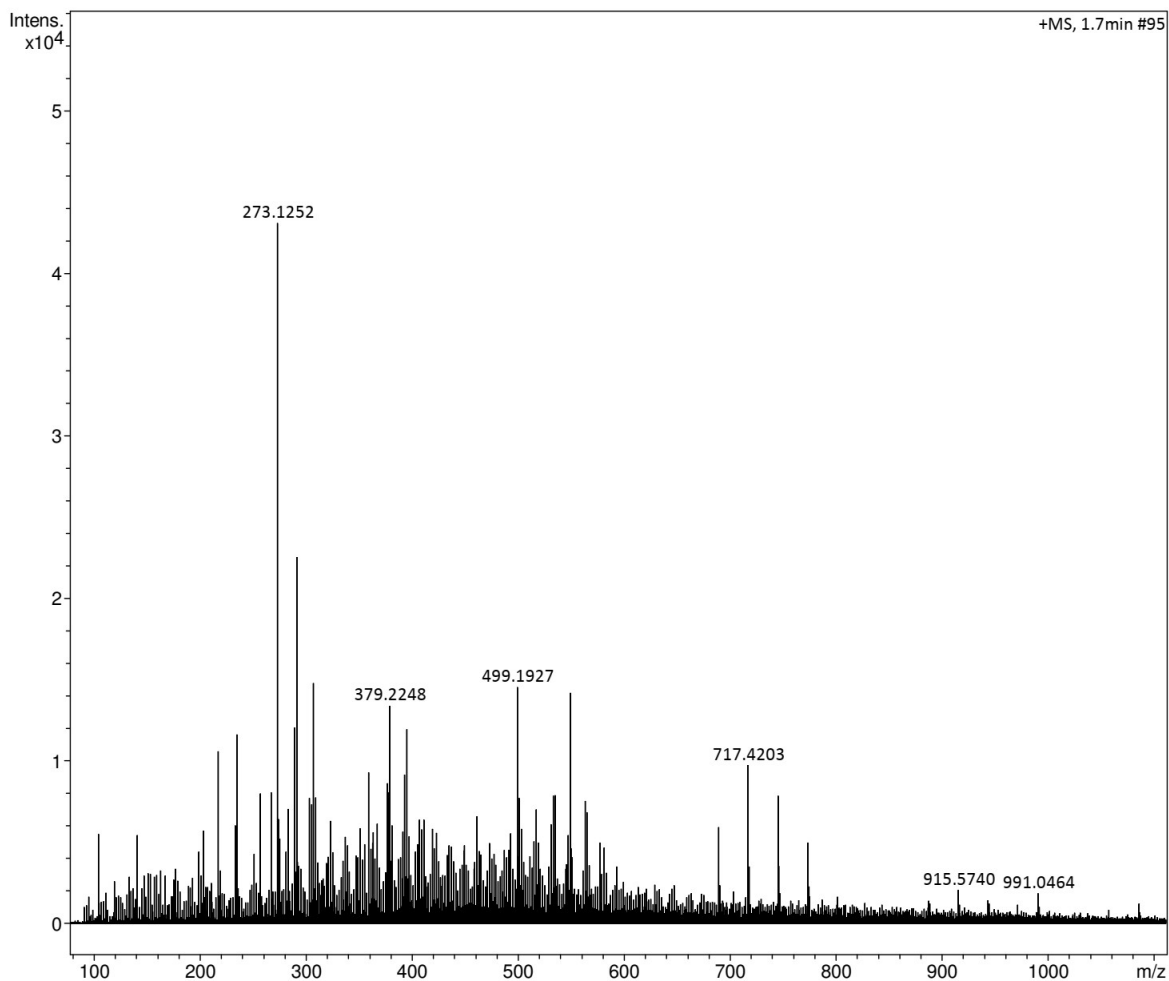

(c)

Savitribai Phule Pune University - Central Instrumentation Facility

Analysis Info

Analysis Name D:\Data\2021\JULY\SPPU CAMPUS\DEPT OF CHEM\PROF. BALAPRASAD  
Method dlc\_ms50-1500mz\_10min\_0.120mlflow\_90b.m  
Sample Name BSh  
Comment

Acquisition Date 7/28/2021 5:27:31 PM  
Operator CIF  
Instrument impact HD 1819696.00184

Acquisition Parameter

|             |          |                      |          |                  |           |
|-------------|----------|----------------------|----------|------------------|-----------|
| Source Type | ESI      | Ion Polarity         | Positive | Set Nebulizer    | 1.7 Bar   |
| Focus       | Active   | Set Capillary        | 4500 V   | Set Dry Heater   | 200 °C    |
| Scan Begin  | 50 m/z   | Set End Plate Offset | -500 V   | Set Dry Gas      | 7.0 l/min |
| Scan End    | 1500 m/z | Set Charging Voltage | 2000 V   | Set Divert Valve | Source    |
|             |          | Set Corona           | 0 nA     | Set APCI Heater  | 0 °C      |

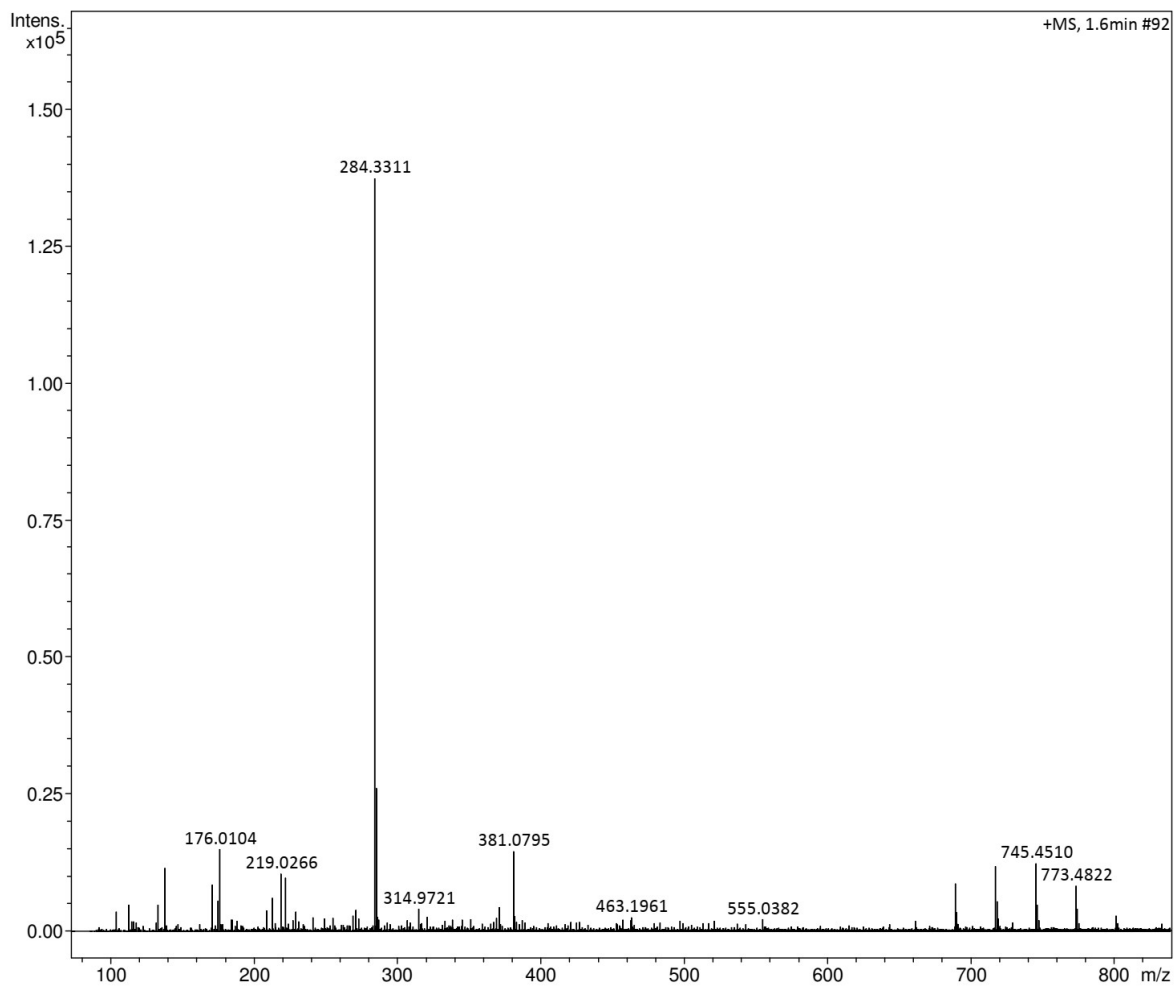

Figure SI-3. HR-MS spectra of BL (a), BS (b), BSc (c) extracts

(a) BL-D2O

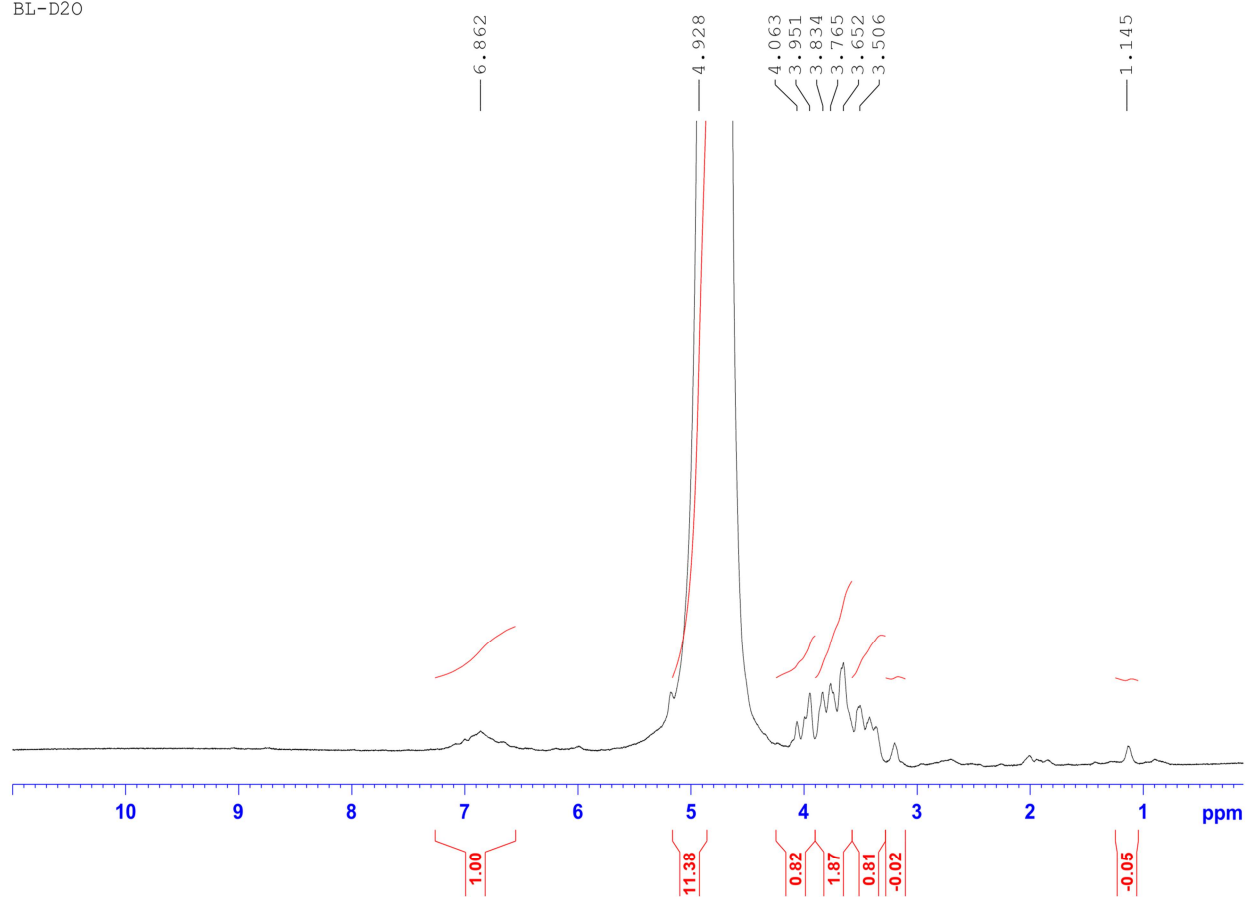



(b) BS-D2O

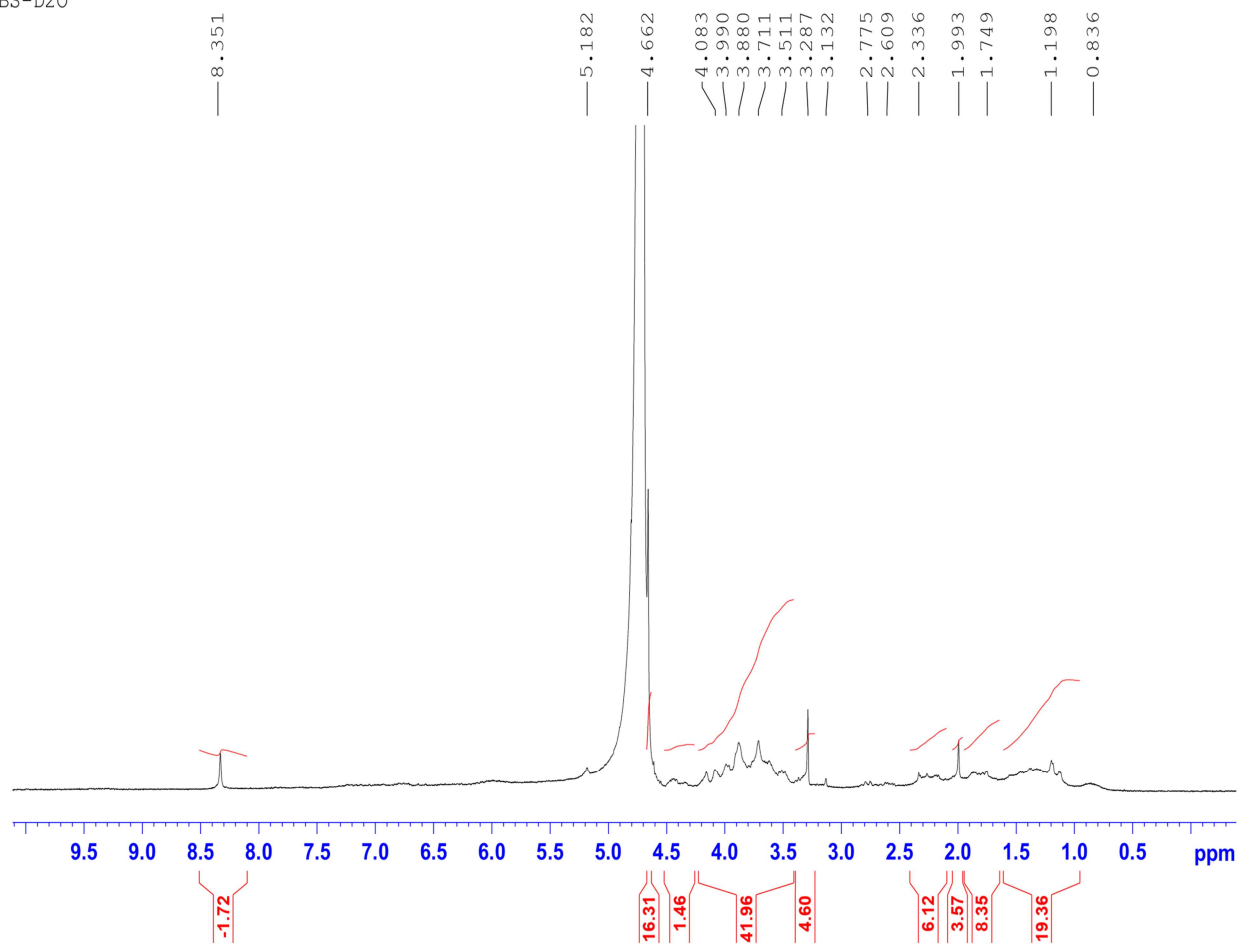

(c) BSH-D2O

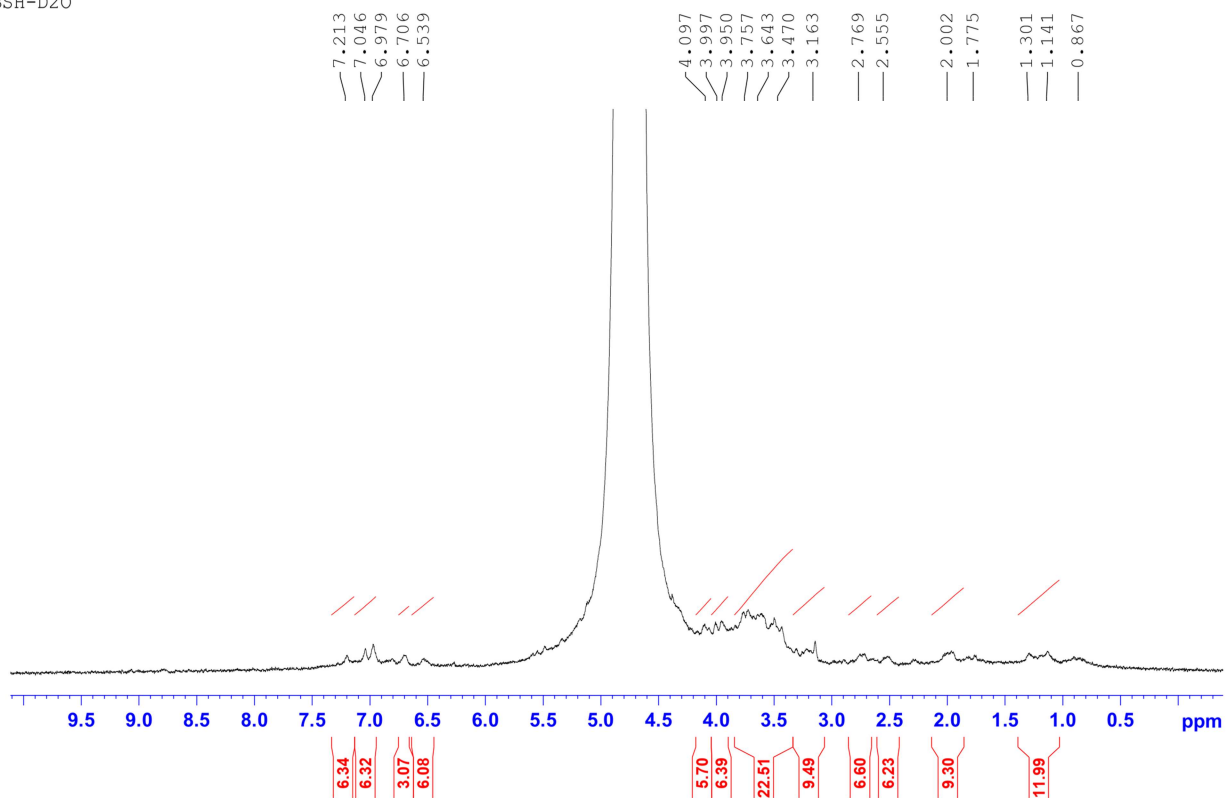

Figure SI-4. NMR spectra of BL (a), BS (b) and BSc (c) extracts
